## Meta-analysis fine-mapping is often miscalibrated at single-variant resolution

Masahiro Kanai<sup>1,2,3,4,5,\*</sup>, Roy Elzur<sup>1,2,3</sup>, Wei Zhou<sup>1,2,3</sup>, Global Biobank Meta-analysis Initiative, Mark J Daly<sup>1,2,3,6</sup>, Hilary K Finucane<sup>1,2,3,\*</sup>

<sup>1</sup>Analytic and Translational Genetics Unit, Massachusetts General Hospital, Boston, MA, USA, <sup>2</sup>Program in Medical and Population Genetics, Broad Institute of MIT and Harvard, Cambridge, MA, USA, <sup>3</sup>Stanley Center for Psychiatric Research, Broad Institute of MIT and Harvard, Cambridge, MA, USA, <sup>4</sup>Department of Biomedical Informatics, Harvard Medical School, Boston, MA, USA, <sup>5</sup>Department of Statistical Genetics, Osaka University Graduate School of Medicine, Suita, Japan, <sup>6</sup>Institute for Molecular Medicine Finland (FIMM), University of Helsinki, Helsinki, Finland.

\* Corresponding authors: Masahiro Kanai ([mkanai@broadinstitute.org](mailto:mkanai@broadinstitute.org)) and Hilary K Finucane ([finucane@broadinstitute.org](mailto:finucane@broadinstitute.org))

### Abstract

Meta-analysis is pervasively used to combine multiple genome-wide association studies (GWAS) into a more powerful whole. To resolve causal variants, meta-analysis studies typically apply summary statistics-based fine-mapping methods as they are applied to single-cohort studies. However, it is unclear whether heterogeneous characteristics of each cohort (*e.g.*, ancestry, sample size, phenotyping, genotyping, or imputation) affect fine-mapping calibration and recall. Here, we first demonstrate that meta-analysis fine-mapping is substantially miscalibrated in simulations when different genotyping arrays or imputation panels are included. To mitigate these issues, we propose a summary statistics-based QC method, SLALOM, that identifies suspicious loci for meta-analysis fine-mapping by detecting outliers in association statistics based on ancestry-matched local LD structure. Having validated SLALOM performance in simulations and the GWAS Catalog, we applied it to 14 disease endpoints from the Global Biobank Meta-analysis Initiative and found that 67% of loci showed suspicious patterns that call into question fine-mapping accuracy. These predicted suspicious loci were significantly depleted for having likely causal variants, such as nonsynonymous variants, as a lead variant (2.7x; Fisher's exact  $P = 7.3 \times 10^{-4}$ ). Compared to fine-mapping results in individual biobanks, we found limited evidence of fine-mapping improvement in the GBMI meta-analyses. Although a full solution requires complete synchronization across cohorts, our approach identifies likely spurious results in meta-analysis fine-mapping. We urge extreme caution when interpreting fine-mapping results from meta-analysis.

## 1 Introduction

2 Meta-analysis is pervasively used to combine multiple genome-wide association studies (GWAS)  
3 from different cohorts<sup>1</sup>. Previous GWAS meta-analyses have identified thousands of loci  
4 associated with complex diseases and traits, such as type 2 diabetes<sup>2,3</sup>, schizophrenia<sup>4,5</sup>,  
5 rheumatoid arthritis<sup>6,7</sup>, body mass index<sup>8</sup>, and lipid levels<sup>9</sup>. These meta-analyses are typically  
6 conducted in large-scale consortia (e.g., the Psychiatric Genomics Consortium [PGC], the Global  
7 Lipids Genetics Consortium [GLGC], and the Genetic Investigation of Anthropometric Traits  
8 [GIANT] consortium) to increase sample size while harmonizing analysis plans across  
9 participating cohorts in every possible aspect (e.g., phenotype definition, quality-control [QC]  
10 criteria, statistical model, and analytical software) by sharing summary statistics as opposed to  
11 individual-level data, thereby avoiding data protection issues and variable legal frameworks  
12 governing individual genome and medical data around the world. The Global Biobank Meta-  
13 analysis Initiative (GBMI)<sup>10</sup> is one such large-scale, international effort, which aims to establish a  
14 collaborative network spanning 23 biobanks from four continents (total  $n = 2.2$  million) for  
15 coordinated GWAS meta-analyses, while addressing the many benefits and challenges in meta-  
16 analysis and subsequent downstream analyses.

17  
18 One such challenging downstream analysis is statistical fine-mapping<sup>11–13</sup>. Despite the great  
19 success of past GWAS meta-analyses in locus discovery, individual causal variants in associated  
20 loci are largely unresolved. Identifying causal variants from GWAS associations (i.e., fine-  
21 mapping) is challenging due to extensive linkage disequilibrium (LD, the correlation among  
22 genetic variants), the presence of multiple causal variants, and limited sample sizes, but is rapidly  
23 becoming achievable with high confidence in individual cohorts<sup>14–17</sup> owing to the recent  
24 development of large-scale biobanks<sup>18–20</sup> and scalable fine-mapping methods<sup>21–23</sup> that enable  
25 well-powered, accurate fine-mapping using in-sample LD from large-scale individual-level data.  
26

27 After conducting GWAS meta-analysis, previous studies<sup>2,7,9,24–30</sup> have applied existing summary  
28 statistics-based fine-mapping methods (e.g., approximate Bayes factor [ABF]<sup>31,32</sup>, CAVIAR<sup>33</sup>,  
29 PAINTOR<sup>34,35</sup>, FINEMAP<sup>21,22</sup>, and SuSiE<sup>23</sup>) just as they are applied to single-cohort studies,  
30 without considering or accounting for the unavoidable heterogeneity among cohorts (e.g.  
31 differences in sample size, phenotyping, genotyping, or imputation). Such heterogeneity could  
32 lead to false positives and miscalibration in meta-analysis fine-mapping (**Fig. 1**). For example,  
33 case-control studies enriched with more severe cases or ascertained with different phenotyping  
34 criteria may disproportionately contribute to genetic discovery, even when true causal effects for  
35 genetic liability are exactly the same between these studies and less severe or unascertained  
36 ones. Quantitative traits like biomarkers could have phenotypic heterogeneity arising from  
37 different measurement protocols and errors across studies. There might be genuine biological  
38 mechanisms too, such as gene–gene (GxG) and gene–environment (GxE) interactions and  
39 (population-specific) dominance variation (e.g., rs671 and alcohol dependence<sup>36</sup>), that introduce  
40 additional heterogeneity across studies<sup>37,38</sup>. In addition to phenotyping, differences in genotyping  
41 and imputation could dramatically undermine fine-mapping calibration and recall at single-variant  
42 resolution, because differential patterns of missingness and imputation quality across constituent  
43 cohorts of different sample sizes can disproportionately diminish association statistics of  
44 potentially causal variants. Finally, although more easily harmonized than phenotyping and  
45 genotyping data, subtle differences in QC criteria and analytical software may further exacerbate  
46 the effect of heterogeneity on fine-mapping.  
47

48 An illustrative example of such issues can be observed in the *TYK2* locus (19p13.2) in the recent  
49 meta-analysis from the COVID-19 Host Genetics Initiative (COVID-19 HGI; **Fig. S1**)<sup>39</sup>. This locus  
50 is known for protective associations against autoimmune diseases<sup>6,24</sup>, while a complete *TYK2*

51 loss of function results in a primary immunodeficiency<sup>40</sup>. Despite strong LD ( $r^2 = 0.82$ ) with a lead  
52 variant in the locus (rs74956615;  $P = 9.7 \times 10^{-12}$ ), a known functional missense variant  
53 rs34536443 (p.Pro1104Ala) that reduces *TYK2* function<sup>41,42</sup> did not achieve genome-wide  
54 significance and was assigned a very low PIP in fine-mapping ( $P = 7.5 \times 10^{-7}$ ; PIP =  $9.5 \times 10^{-4}$ ),  
55 primarily due to its missingness in two more cohorts than rs74956615. This serves as just one  
56 example of the major difficulties with meta-analysis fine-mapping at single-variant resolution.  
57 Indeed, the COVID-19 HGI cautiously avoided an *in-silico* fine-mapping in the flagship to prevent  
58 spurious results<sup>39</sup>.

59  
60 Only a few studies have carefully addressed these concerns in their downstream analyses. The  
61 Schizophrenia Working Group of PGC, for example, recently updated their largest meta-analysis  
62 of schizophrenia<sup>5</sup> (69,369 cases and 236,642 controls), followed by a downstream fine-mapping  
63 analysis using FINEMAP<sup>21</sup>. Unlike many other GWAS consortia, since PGC has access to  
64 individual-level genotypes for a majority of samples, they were able to apply standardized sample  
65 and variant QC criteria and impute variants using the same reference panel, all uniformly  
66 processed using the RICOPILI pipeline<sup>43</sup>. This harmonized procedure was crucial for properly  
67 controlling inter-cohort heterogeneity and thus allowing more robust meta-analysis fine-mapping  
68 at single-variant resolution. Furthermore, PGC's direct access to individual-level data enabled  
69 them to compute in-sample LD matrices for multiple causal variant fine-mapping, which prevents  
70 the significant miscalibration that results from using an external LD reference<sup>14-16</sup>. A 2017 fine-  
71 mapping study of inflammatory bowel disease also benefited from access to individual-level  
72 genotypes and careful pre- and post-fine-mapping QC<sup>44</sup>. For a typical meta-analysis consortium,  
73 however, many of these steps are infeasible as full genotype data from all cohorts is not available.  
74 For such studies, a new approach to meta-analysis fine-mapping in the presence of the many  
75 types of heterogeneity is needed. Until such a method is developed, QC of meta-analysis fine-  
76 mapping results deserves increased attention.

77  
78 While existing variant-level QC procedures are effective for limiting spurious associations in  
79 GWAS (**Supplementary Box**)<sup>45</sup>, they do not suffice for ensuring high-quality fine-mapping results.  
80 In some cases, they even hurt fine-mapping quality, because they can i) cause or exacerbate  
81 differential patterns of missing variants across cohorts, and ii) remove true causal variants as well  
82 as suspicious variants. Thus, additional QC procedures that retain consistent variants across  
83 cohorts for consideration but limit poor-quality fine-mapping results are needed. A recently  
84 proposed method called DENTIST<sup>46</sup>, for example, performs summary statistics QC to improve  
85 GWAS downstream analyses, such as conditional and joint analysis (GCTA-COJO<sup>47</sup>), by  
86 removing variants based on estimated heterogeneity between summary statistics and reference  
87 LD. Although DENTIST was also applied prior to fine-mapping (FINEMAP<sup>21</sup>), simulations only  
88 demonstrated that it could improve power for detecting the correct number of causal variants in a  
89 locus, not true causal variants. This motivated us to develop a new fine-mapping QC method for  
90 better calibration and recall at single-variant resolution and to demonstrate its performance in  
91 large-scale meta-analysis.

92  
93 Here, we first demonstrate the effect of inter-cohort heterogeneity in meta-analysis fine-mapping  
94 via realistic simulations with multiple heterogeneous cohorts, each with different combinations of  
95 genotyping platforms, imputation reference panels, and genetic ancestries. We propose a  
96 summary statistics-based QC method, SLALOM (ssuspicious loci analysis of meta-analysis  
97 summary statistics), that identifies suspicious loci for meta-analysis fine-mapping by detecting  
98 association statistics outliers based on local LD structure, building on the DENTIST method.  
99 Applying SLALOM to 14 disease endpoints from the Global Biobank Meta-analysis Initiative<sup>10</sup> as  
100 well as 467 meta-analysis summary statistics from the GWAS Catalog<sup>48</sup>, we demonstrate that

101 suspicious loci for fine-mapping are widespread in meta-analysis and urge extreme caution when  
102 interpreting fine-mapping results from meta-analysis.  
103

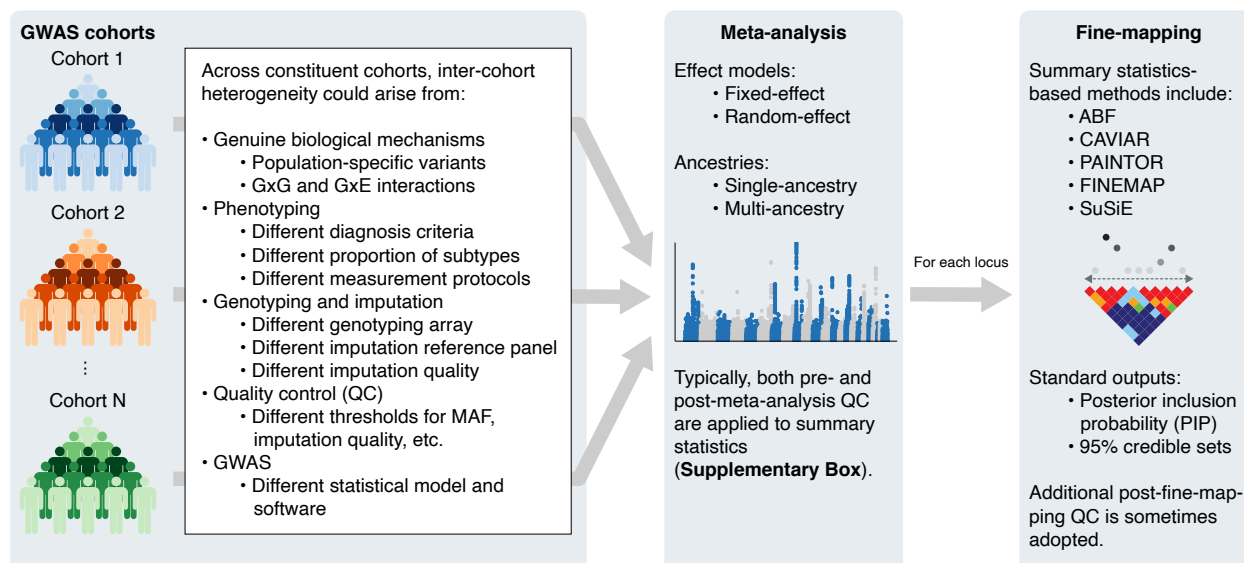

104  
105 **Fig. 1 | Schematic overview of meta-analysis fine-mapping.**

## 106 Results

### 107 Large-scale simulations demonstrate miscalibration in meta-analysis fine-mapping

108 Existing fine-mapping methods<sup>21,23,31</sup> assume that all association statistics are derived from a  
109 single-cohort study, and thus do not model the per-variant heterogeneity in effect sizes and  
110 sample sizes that arise when meta-analyzing multiple cohorts (**Figure 1**). To evaluate how  
111 different characteristics of constituent cohorts in a meta-analysis affect fine-mapping calibration  
112 and recall, we conducted a series of large-scale GWAS meta-analysis and fine-mapping  
113 simulations (**Table S1–4; Methods**). Briefly, we simulated multiple GWAS cohorts of different  
114 ancestries (10 European ancestry, one African ancestry and one East Asian ancestry cohorts;  $n$   
115 = 10,000 each) that were genotyped and imputed using different genotyping arrays (Illumina  
116 Omni2.5, Multi-Ethnic Global Array [MEGA], and Global Screening Array [GSA]) and imputation  
117 reference panels (the 1000 Genomes Project Phase 3 [1000GP3]<sup>49</sup>, the Haplotype Reference  
118 Consortium [HRC]<sup>50</sup>, and the TOPMed<sup>51</sup>). For each combination of cohort, genotyping array, and  
119 imputation panel, we conducted 300 GWAS with randomly simulated causal variants that  
120 resemble the genetic architecture of a typical complex trait, including minor allele frequency (MAF)  
121 dependent causal effect sizes<sup>52</sup>, total SNP heritability<sup>53</sup>, functional consequences of causal  
122 variants<sup>17</sup>, and levels of genetic correlation across cohorts (*i.e.*, true effect size heterogeneity;  $r_g$   
123 = 1, 0.9, and 0.5; see **Methods**). We then meta-analyzed the single-cohort GWAS results across  
124 10 independent cohorts based on multiple *configurations* (different combinations of genotyping  
125 arrays and imputation panels for each cohort) to resemble realistic meta-analysis of multiple  
126 heterogeneous cohorts (**Table S4**). We applied ABF fine-mapping to compute a posterior  
127 inclusion probability (PIP) for each variant and to derive 95% and 99% credible sets (CS) that  
128 contain the smallest set of variants covering 95% and 99% of probability of causality. We  
129 evaluated the false discovery rate (FDR, defined as the proportion of variants with PIP > 0.9 that  
130 are non-causal) and compared against the expected proportion of non-causal variants if the meta-  
131 analysis fine-mapping method were calibrated, based on PIP. More details of our simulation  
132 pipeline are described in **Methods** and visually summarized in **Fig. S2**.



133  
134 We found that FDR varied widely over the different configurations, reaching as high as 37% for  
135 the most heterogeneous configurations (**Fig. 2**). We characterized the contributing factors to the  
136 miscalibration. We first found that lower true effect size correlation  $r_g$  (*i.e.*, larger phenotypic  
137 heterogeneity) always caused higher miscalibration and lower recall. Second, when using the  
138 same imputation panel (1000GP3), use of less dense arrays (MEGA or GSA) led to moderately  
139 inflated FDR (up to FDR = 11% vs. expected 1%), while use of multiple genotyping array did not  
140 cause further FDR inflation (**Fig. 2a**). Third, when using the same genotyping array (Omni2.5),  
141 use of imputation panels (HRC or TOPMed) that does not match our simulation reference  
142 significantly affects miscalibration (up to FDR = 17% vs. expected 1%), and using multiple  
143 imputation panels further increased miscalibration (up to FDR = 35% vs. expected 2%, **Fig. 2c**);  
144 this setup is as bad as the most heterogeneous configuration using multiple genotyping arrays  
145 and imputation panels (FDR = 37%). When TOPMed-imputed variants were lifted over from  
146 GRCh38 to GRCh37, we observed FDR increases of up to 10%, likely due to genomic build  
147 conversion failures (**Supplementary Note**)<sup>54</sup>. Fourth, recall was not significantly affected by  
148 heterogeneous genotyping arrays or imputation panels (**Fig. 2b,d**). Fifth, including multiple  
149 genetic ancestries did not affect calibration when using the same genotyping array and imputation  
150 panel (Omni 2.5 and 1000GP3; **Fig. 2e**) but significantly improved recall if African ancestry was  
151 included (**Fig. 2f**). This is expected, given the shorter LD length in the African population  
152 compared to other populations, which improves fine-mapping resolution<sup>55</sup>. Finally, in the most  
153 heterogeneous configurations where multiple genotyping arrays and imputation panels existed,  
154 we observed a FDR of up to 37% and 28% for European and multi-ancestry meta-analyses,  
155 respectively (vs. expected 2% for both), demonstrating that inter-cohort heterogeneity can  
156 substantially undermine meta-analysis fine-mapping (**Fig. 2g,h**).  
157

158 To further characterize observed miscalibration in meta-analysis fine-mapping, we investigated  
159 the availability of GWAS variants in each combination of ancestry, genotyping array, and  
160 imputation panel. Out of 3,285,617 variants on chromosome 3 that passed variant QC in at least  
161 one combination (per-combination MAF > 0.001 and Rsq > 0.6; **Methods**), 574,261 variants  
162 (17%) showed population-level gnomAD MAF > 0.001 in every ancestry that we simulated  
163 (African, East Asian, and European). Because we used a variety of imputation panels, we  
164 retrieved population-level MAF from gnomAD. Of these 574,261 variants, 389,219 variants (68%)  
165 were available in every combination (**Fig. S3a**). This fraction increased from 68% to 73%, 74%,  
166 and 76% as we increased gnomAD MAF thresholds to > 0.005, 0.01, and 0.05, respectively, but  
167 never reached 100% (**Fig. S4**). Notably, we observed a substantial number of variants that are  
168 unique to a certain genotyping array and an imputation panel, even when we restricted to 344,497  
169 common variants (gnomAD MAF > 0.05) in every ancestry (**Fig. S3b**). For example, there are  
170 34,317 variants (10%) that were imputed in the 1000GP3 and TOPMed reference but not in the  
171 HRC. Likewise, we observed 33,106 variants (10%) that were specific to the 1000GP3 reference  
172 and even 3,066 variants (1%) that were imputed in every combination except for East Asian  
173 ancestry with the GSA array and the TOPMed reference. When using different combinations of  
174 gnomAD MAF thresholds (> 0.001, 0.005, 0.01, or 0.05 in every ancestry) and Rsq thresholds (>  
175 0.2, 0.4, 0.6, or 0.8), we observed the largest fraction of shared variants (78%) was achieved with  
176 gnomAD MAF > 0.01 and Rsq > 0.2 while the largest number of the shared variants (427,494  
177 variants) was achieved with gnomAD MAF > 0.001 and Rsq > 0.2, leaving it unclear which  
178 thresholds would be preferable in the context of fine-mapping (**Fig. S4**).  
179

180 The remaining 2,711,356 QC-passing variants in our simulations (gnomAD MAF  $\leq$  0.001 in at  
181 least one ancestry) further exacerbate variable coverage of the available variants (**Fig. S3c**). Of  
182 these, the largest proportion of variants (39%) were only available in African ancestry, followed

183 by African and European (but not in East Asian) available variants (7%), European-specific  
 184 variants (6%), and East Asian-specific variants (5%). Furthermore, similar to the aforementioned  
 185 common variants, we found a substantial number of variants that are unique to a certain  
 186 combination. Altogether, we observed that only 393,471 variants (12%) out of all the QC-passing  
 187 3,285,617 variants were available in every combination (**Fig. S3d**). These observations  
 188 recapitulate that different combinations of genetic ancestry, genotyping array, imputation panels,  
 189 and QC thresholds substantially affect the availability of common, well-imputed variants for  
 190 association testing<sup>56</sup>.

191  
 192 Thus, the different combinations of genotyping and imputation cause each cohort in a meta-  
 193 analysis to have a different set of variants, and consequently variants can have very different  
 194 overall sample sizes. In our simulations with the most heterogeneous configurations, we found  
 195 that 66% of the false positive loci (where a non-causal [false positive] variant was assigned PIP  
 196 > 0.9) had different sample sizes for true causal and false positive variants (median  
 197 maximum/minimum sample size ratio = 1.4; **Fig. S5**). Analytically, we found that at common meta-  
 198 analysis sample sizes and genome-wide significant effect size regimes, when two variants have  
 199 similar marginal effects, the one with the larger sample size will usually achieve a higher ABF PIP  
 200 (**Supplementary Note; Fig. S6–8**). This elucidates the mechanism by which sample size  
 201 imbalance can lead to miscalibration.  
 202  
 203

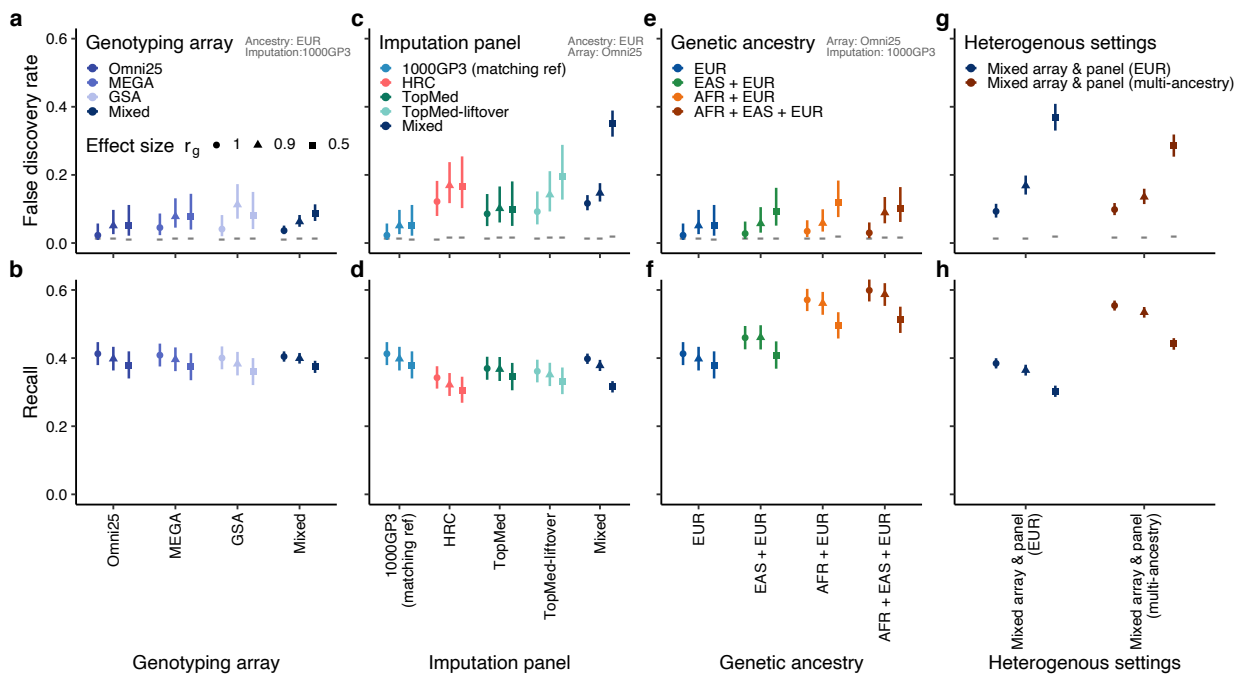

204  
 205 **Fig. 2 | Evaluation of false discovery rate (FDR) and recall in meta-analysis fine-mapping simulations.** We  
 206 evaluated FDR and recall in meta-analysis fine-mapping using different genotyping arrays (**a,b**), imputation reference  
 207 panels (**c,d**), genetic ancestries (**e, f**), and more heterogeneous settings by combining these (**g, h**). As shown in top-  
 208 right gray labels, the EUR ancestry, the Omni2.5 genotyping array and/or the 1000GP3 reference panel were used  
 209 unless otherwise stated. FDR is defined as the proportion of non-causal variants with PIP > 0.9. Horizontal gray lines  
 210 represent 1 – mean PIP, *i.e.* expected FDR were the method calibrated. Recall is defined as the proportion of true  
 211 causal variants in the top 1% PIP bin. Shapes correspond to the true effect size correlation  $r_g$  across cohorts which  
 212 represent a phenotypic heterogeneity parameter (the lower  $r_g$ , the higher phenotypic heterogeneity).

## 213 Overview of the SLALOM method

214 To address the challenges in meta-analysis fine-mapping discussed above, we developed  
215 SLALOM (ssuspicious loci analysis of meta-analysis summary statistics), a method that flags  
216 suspicious loci for meta-analysis fine-mapping by detecting outliers in association statistics based  
217 on deviations from expectation, estimated with local LD structure (**Methods**). SLALOM consists  
218 of three steps, 1) defining loci and lead variants based on a 1 Mb window, 2) detecting outlier  
219 variants in each locus using meta-analysis summary statistics and an external LD reference  
220 panel, and 3) identifying suspicious loci for meta-analysis fine-mapping (**Fig. 3a,b**).

221  
222 To detect outlier variants, we first assume a single causal variant per associated locus. Then the  
223 marginal z-score  $z_i$  for a variant  $i$  should be approximately equal to  $r_{i,c} \cdot z_c$  where  $z_c$  is the z-score  
224 of the causal variant  $c$ , and  $r_{i,c}$  is a correlation between variants  $i$  and  $c$ . For each variant in meta-  
225 analysis summary statistics, we first test this relationship using a simplified version of the  
226 DENTIST statistics<sup>46</sup>, DENTIST-S, based on the assumption of a single causal variant. The  
227 DENTIST-S statistics for a given variant  $i$  is written as

$$228 \quad T_i = \frac{(z_i - r_{i,c} z_c)^2}{1 - r_{i,c}^2} \quad (1)$$

230  
231 which approximately follows a  $\chi^2$  distribution with 1 degree of freedom<sup>46</sup>. Since the true causal  
232 variant and LD structure are unknown in real data, we approximate the causal variant as the lead  
233 PIP variant in the locus (the variant with the highest PIP) and use a large-scale external LD  
234 reference from gnomAD<sup>57</sup>, either an ancestry-matched LD for a single-ancestry meta-analysis or  
235 a sample-size-weighted LD by ancestries for a multi-ancestry meta-analysis (**Methods**). We note  
236 that the existence of multiple independent causal variants in a locus would not affect SLALOM  
237 precision but would decrease recall (see **Discussion**).

238  
239 SLALOM then evaluates whether each locus is “suspicious”—that is, has a pattern of meta-  
240 analysis statistics and LD that appear inconsistent and therefore call into question the fine-  
241 mapping accuracy. By training on loci with maximum PIP > 0.9 in the simulations, we determined  
242 that the best-performing criterion for classifying loci as true or false positives is whether a locus  
243 has a variant with  $r^2 > 0.6$  to the lead and DENTIST-S  $P$ -value <  $1.0 \times 10^{-4}$  (**Methods**). Using this  
244 criterion we achieved an area under the receiver operating characteristic curve (AUROC) of 0.74,  
245 0.76, and 0.80 for identifying whether a true causal variant is a lead PIP variant, in 95% credible  
246 set (CS), and in 99% CS, respectively (**Fig. 3c**). Using different thresholds, we observed that the  
247 SLALOM performance is not very sensitive to thresholds near the threshold we chose (**Fig. S9**).  
248 We further validated the performance of SLALOM using all the loci in the simulations and  
249 observed significantly higher miscalibration in predicted suspicious loci than in non-suspicious  
250 loci (up to 16% difference in FDR at PIP > 0.9; **Fig. 3d**). We found that SLALOM-predicted  
251 “suspicious” loci tend to be from more heterogeneous configurations and the SLALOM sensitivity  
252 and specificity depends on the level of heterogeneity (**Table S5**). Given the relatively lower  
253 miscalibration and specificity at low PIP thresholds (**Fig. 3d,e**), in subsequent real data analysis  
254 we restricted the application of SLALOM to loci with maximum PIP > 0.1 (**Methods**).

255

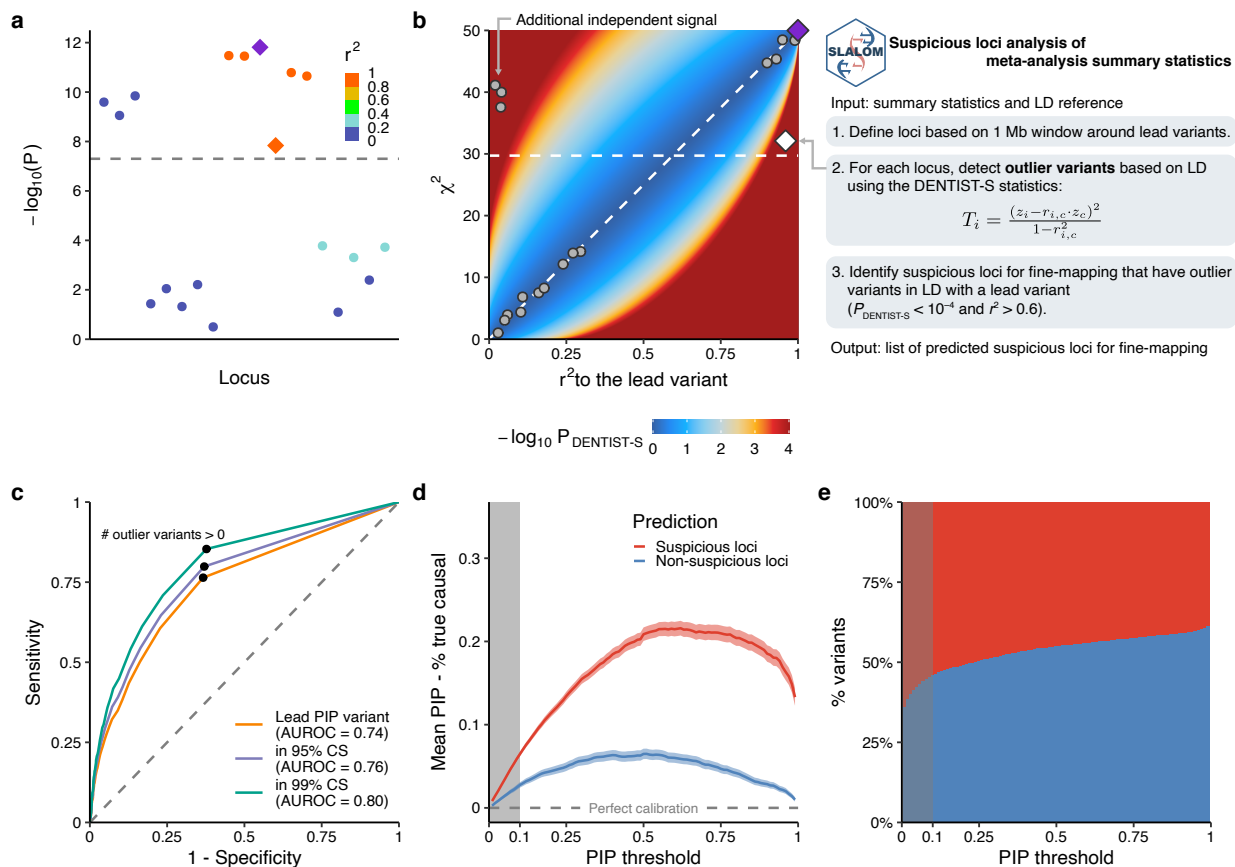

256  
257  
258 **Fig. 3 | Overview of the SLALOM method.** **a,b.** An illustrative example of the SLALOM application. **a.** In an example  
259 locus, two independent association signals are depicted: i) the most significant signal that contains a lead variant (purple  
260 diamond) and five additional variants that are in strong LD ( $r^2 > 0.9$ ) with the lead variant, and ii) an additional  
261 independent signal ( $r^2 < 0.05$ ). There is one outlier variant (orange diamond) in the first signal that deviates from the  
262 expected association based on LD. **b.** Step-by-step procedure of the SLALOM method. For outlier variant detection in  
263 a locus, a diagnosis plot of  $r^2$  values to the lead variant vs. marginal  $\chi^2$  is shown to aid interpretation. Background color  
264 represents a theoretical distribution of  $-\log_{10} P_{\text{DENTIST-S}}$  values when a lead variant has a marginal  $\chi^2$  of 50, assuming  
265 no allele flipping. Points represent the variants depicted in the example locus (**a**), where the lead variant (purple  
266 diamond) and the outlier variant (white diamond) were highlighted. Diagonal line represents an expected marginal  
267 association. Horizontal dotted lines represent the genome-wide significance threshold ( $P < 5.0 \times 10^{-8}$ ). **c.** The ROC  
268 curve of SLALOM prediction for identifying suspicious loci in the simulations. Positive conditions were defined as  
269 whether a true causal variant in a locus is 1) a lead PIP variant, 2) in 95% CS, and 3) in 99% CS. AUROC values were  
270 shown in the labels. Black points represent the performance of our adopted metric, *i.e.*, whether a locus contains at  
271 least one outlier variant ( $P_{\text{DENTIST-S}} < 1.0 \times 10^{-4}$  and  $r^2 > 0.6$ ). **d.** Calibration plot in the simulations under different PIP  
272 thresholds. Calibration was measured as the mean PIP – fraction of true causal variants among variants above the  
273 threshold. Shadows around the lines represent 95% confidence intervals. **e.** The fraction of variants in predicted  
274 suspicious and non-suspicious loci under different PIP thresholds. Gray shadows in the panels **d,e** represent a PIP  $\leq$   
275 0.1 region as we excluded loci with maximum PIP  $\leq 0.1$  in the actual SLALOM analysis based on these panels.



## 276 **Widespread suspicious loci for fine-mapping in existing meta-analysis summary** 277 **statistics**

278 Having assessed the performance of SLALOM in simulations, we applied SLALOM to 467 meta-  
279 analysis summary statistics in the GWAS Catalog<sup>48</sup> that are publicly available with a sufficient  
280 discovery sample size ( $N > 10,000$ ; **Table S6; Methods**) to quantify the prevalence of suspicious  
281 loci in existing studies. These summary statistics were mostly European ancestry-only meta-  
282 analysis (63%), followed by multi-ancestry (31%), East Asian ancestry-only (3%), and African  
283 ancestry-only (2%) meta-analyses. Across 467 summary statistics from 96 publications, we  
284 identified 28,925 loci with maximum PIP  $> 0.1$  (out of 35,864 genome-wide significant loci defined  
285 based on 1 Mb window around lead variants; **Methods**) for SLALOM analysis, of which 8,137 loci  
286 (28%) were predicted suspicious (**Table S7**).

287  
288 To validate SLALOM performance in real data, we restricted our analysis to 6,065 loci that have  
289 maximum PIP  $> 0.1$  and that contain nonsynonymous coding variants (predicted loss-of-function  
290 [pLoF] and missense) in LD with the lead variant ( $r^2 > 0.6$ ). Given prior evidence<sup>16,17,44</sup> that such  
291 nonsynonymous variants are highly enriched for being causal, we tested the validity of our method  
292 by whether they achieve the highest PIP in the locus (*i.e.*, successful fine-mapping) in suspicious  
293 vs. non-suspicious loci (**Methods**). While 40% (1,557 / 3,860) of non-suspicious loci successfully  
294 fine-mapped nonsynonymous variants, only 17% (384 / 2,205) of suspicious loci did,  
295 demonstrating a significant depletion (2.3x) of successfully fine-mapped nonsynonymous variants  
296 in suspicious loci (Fisher's exact  $P = 3.6 \times 10^{-79}$ ; **Fig. 4a**). We also tested whether  
297 nonsynonymous variants belonged to 95% and 99% CS and again observed significant depletion  
298 (1.4x and 1.3x, respectively; Fisher's exact  $P < 4.6 \times 10^{-100}$ ). In addition, when we used a more  
299 stringent  $r^2$  threshold ( $> 0.8$ ) for selecting loci that contain nonsynonymous variants, we also  
300 confirmed significant enrichment (Fisher's exact  $P < 6.1 \times 10^{-65}$ ; **Fig. S10**). To quantify potential  
301 fine-mapping miscalibration in the GWAS Catalog, we investigated the difference between mean  
302 PIP for lead variants and fraction of lead variants that are nonsynonymous; assuming that  
303 nonsynonymous variants in these loci are truly causal, this difference equals the difference  
304 between the true and reported fraction of lead PIP variants that are causal. We observed  
305 differences between 26–51% and 10–18% under different PIP thresholds in suspicious and non-  
306 suspicious loci, respectively (**Fig. 4b**), marking 45% and 15% for high-PIP ( $> 0.9$ ) variants.

307  
308 We further assessed SLALOM performance in the GWAS Catalog meta-analyses by leveraging  
309 high-PIP ( $> 0.9$ ) complex trait and *cis*-eQTL variants that were rigorously fine-mapped<sup>16,17</sup> in large-  
310 scale biobanks (Biobank Japan [BBJ]<sup>58</sup>, FinnGen<sup>20</sup>, and UK Biobank [UKBB]<sup>19</sup>) and eQTL  
311 resources (GTEx<sup>59</sup> v8 and eQTL Catalogue<sup>60</sup>). Among the 27,713 loci analyzed by SLALOM  
312 (maximum PIP  $> 0.1$ ) that contain a lead variant that was included in biobank fine-mapping, 17%  
313 (3,266 / 19,692) of the non-suspicious loci successfully fine-mapped one of the high-PIP GWAS  
314 variants in biobank fine-mapping, whereas 7% (589 / 8,021) of suspicious loci did, showing a  
315 significant depletion (2.3x) of the high-PIP complex trait variants in suspicious loci (Fisher's exact  
316  $P = 4.6 \times 10^{-100}$ ; **Fig. 4c**). Similarly, among 26,901 loci analyzed by SLALOM that contain a lead  
317 variant that was included in *cis*-eQTL fine-mapping, we found a significant depletion (1.9x) of the  
318 high-PIP *cis*-eQTL variants in suspicious loci, where 7% (1,247 / 18,976) of non-suspicious loci  
319 vs. 4% (281 / 7,925) of suspicious loci successfully fine-mapped one of the high-PIP *cis*-eQTL  
320 variants (Fisher's exact  $P = 2.6 \times 10^{-24}$ ; **Fig. 4d**). We observed the same significant depletions of  
321 the high-PIP complex trait and *cis*-eQTL variants in suspicious loci that belonged to 95% and 99%  
322 CS set (**Fig. 4c,d**).

323  
324

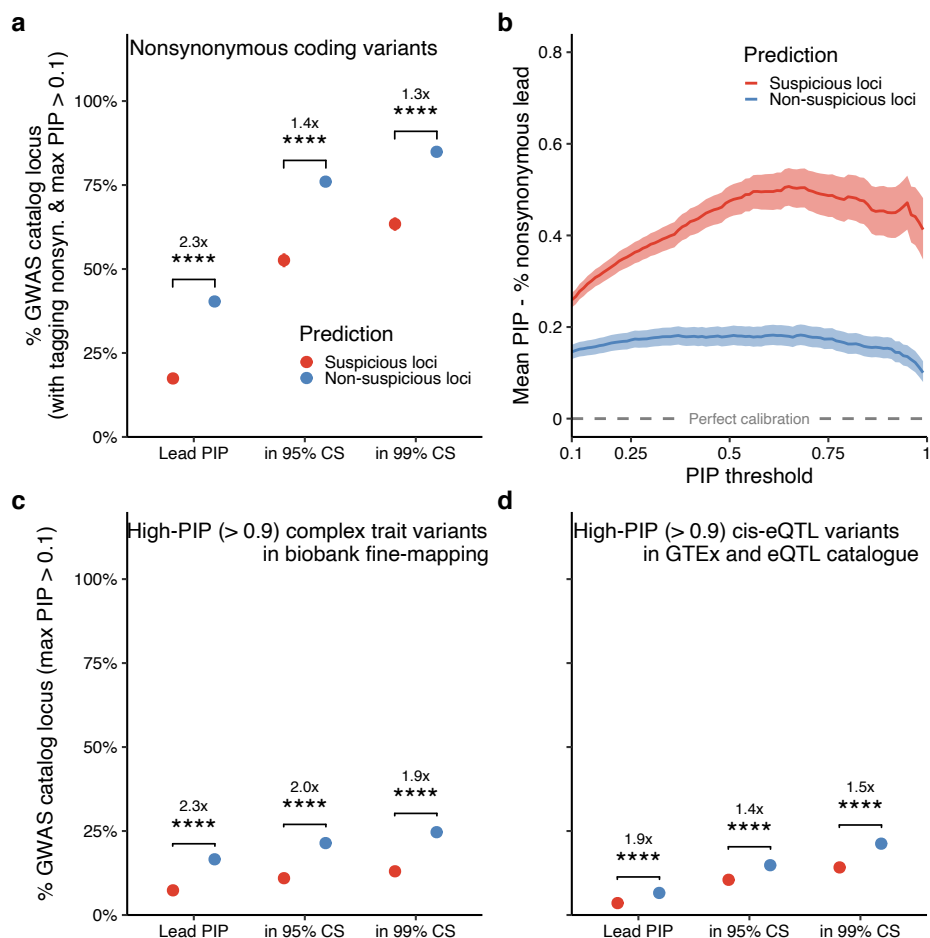

325  
 326 **Fig. 4 | Evaluation of SLALOM performance in the GWAS Catalog summary statistics.** a,c,d. Depletion of likely  
 327 causal variants in predicted suspicious loci. We evaluated whether (a) nonsynonymous coding variants (pLoF and  
 328 missense), (c) high-PIP (> 0.9) complex trait variants in biobank fine-mapping, and (d) high-PIP (> 0.9) *cis*-eQTL  
 329 variants in GTEx v8 and eQTL Catalogue were lead PIP variants, in 95% CS, or in 99% CS in suspicious vs. non-  
 330 suspicious loci. Depletion was calculated by relative risk (*i.e.* a ratio of proportions; **Methods**). Error bars, invisible due  
 331 to their small size, correspond to 95% confidence intervals using bootstrapping. Significance represents a Fisher's  
 332 exact test *P*-value (\*, *P* < 0.05; \*\*, < 0.01; \*\*\*, < 0.001; \*\*\*\*, < 10<sup>-4</sup>). b. Plot of the estimated difference between true  
 333 and reported proportion of causal variants in the loci tagging nonsynonymous variants (*r*<sup>2</sup> > 0.6 with the lead variants)  
 334 in the GWAS Catalog under different PIP thresholds. Analogous to **Fig. 3b**, assuming nonsynonymous variants in these  
 335 loci are truly causal, the mean PIP for lead variants minus the fraction of lead variants that are nonsynonymous above  
 336 the threshold is equal to the difference between true and reported proportion of causal variants.  
 337

### 338 Suspicious loci for fine-mapping in the GBMI summary statistics

339 Next, we applied SLALOM to meta-analysis summary statistics of 14 disease endpoints from the  
 340 GBMI<sup>10</sup>. These summary statistics were generated from a meta-analysis of up to 1.8 million  
 341 individuals in total across 18 biobanks for discovery, representing six different genetic ancestry  
 342 groups of approximately 33,000 African, 18,000 Admixed American, 31,000 Central and South  
 343 Asian, 341,000 East Asian, 1.4 million European, and 1,600 Middle Eastern individuals (**Table**  
 344 **S8**). Among 489 genome-wide significant loci across the 14 traits (excluding the major  
 345 histocompatibility complex [MHC] region, **Methods**), we found that 82 loci (17%) showed  
 346 maximum PIP < 0.1, thus not being further considered by SLALOM. Of the remaining 407 loci  
 347 with maximum PIP > 0.1, SLALOM identified that 272 loci (67%) were suspicious loci for fine-  
 348 mapping (**Fig. 5a**; **Table S9**). The fraction of suspicious loci and their maximum PIP varied by  
 349 trait, reflecting different levels of statistical power (e.g., sample sizes, heritability, and local LD  
 350 structure) as well as inter-cohort heterogeneity (**Fig. 5b–o**).

351  
 352 While the fraction of suspicious loci (67%) in the GBMI meta-analyses is higher than in the GWAS  
 353 Catalog (28%), there might be multiple reasons for this discrepancy, including association  
 354 significance, sample size, ancestral diversity, and study-specific QC criteria. For example, the  
 355 GBMI summary statistics were generated from multi-ancestry, large-scale meta-analyses of  
 356 median sample size of 1.4 million individuals across six ancestries, while 63% of the 467 summary  
 357 statistics from the GWAS Catalog were only in European-ancestry studies and 83% had less than  
 358 0.5 million discovery samples. Nonetheless, predicted suspicious loci for fine-mapping were  
 359 prevalent in both the GWAS Catalog and the GBMI.  
 360

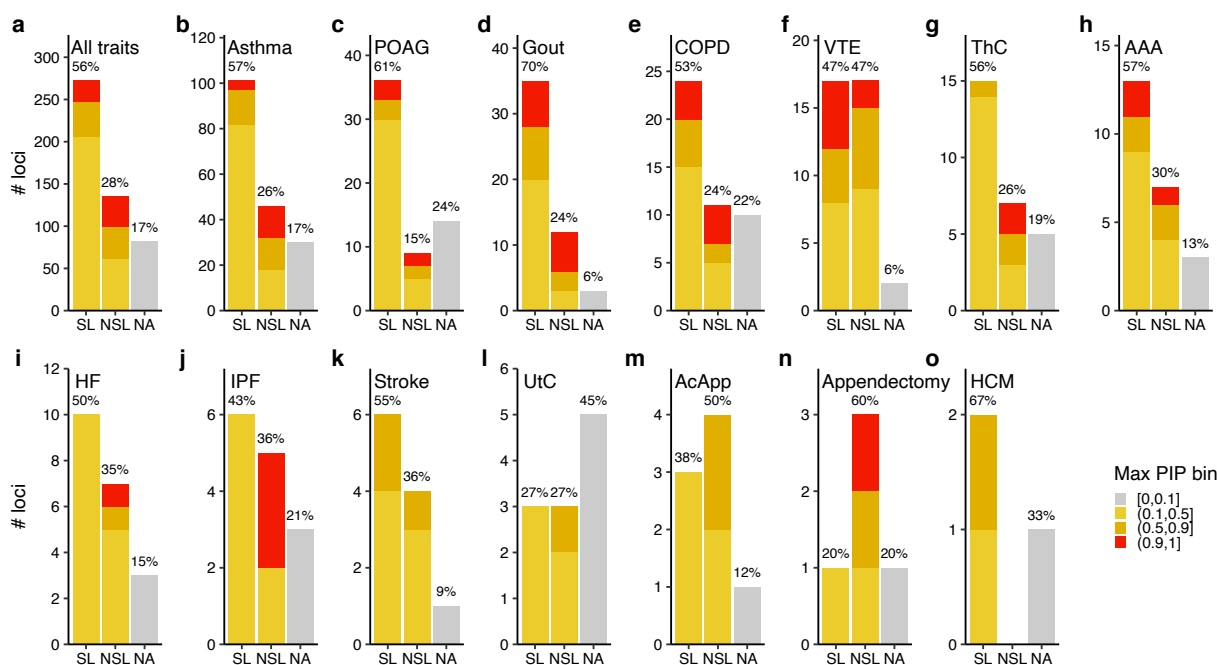

361  
 362 **Fig. 5 | SLALOM prediction results in the GBMI summary statistics.** For (a) all 14 traits and (b–o) individual traits,  
 363 a number of predicted suspicious (SL), non-suspicious (NSL), and non-applicable (NA; maximum PIP < 0.1) loci were  
 364 summarized. Individual traits are ordered by the total number of loci. Color represents the maximum PIP in a locus.  
 365 Label represents the fraction of loci in each prediction category. AAA, abdominal aortic aneurysm. AcApp, acute  
 366 appendicitis. COPD, chronic obstructive pulmonary disease. HCM, hypertrophic cardiomyopathy. HF, heart failure. IPF,  
 367 idiopathic pulmonary fibrosis. POAG, primary open angle glaucoma. ThC, thyroid cancer. UtC, uterine cancer. VTE,  
 368 venous thromboembolism.  
 369

370 Using nonsynonymous (pLoF and missense) and high-PIP ( $> 0.9$ ) complex trait and *cis*-eQTL  
371 variants, we recapitulated a significant depletion of these likely causal variants in predicted  
372 suspicious loci (2.7x, 5.2x, and 5.1x for nonsynonymous, high-PIP complex trait, and high-PIP  
373 *cis*-eQTL variants being a lead PIP variant, respectively; Fisher's exact  $P < 7.3 \times 10^{-4}$ ), confirming  
374 our observation in the GWAS Catalog analysis (**Fig. 6a–c**).

375  
376 In 15/23 non-suspicious loci harboring a nonsynonymous variant, the nonsynonymous variant  
377 had the highest PIP. These included known missense variants such as rs116483731 (p.Arg20Gln)  
378 in *SPDL1* for idiopathic pulmonary fibrosis (IPF)<sup>61,62</sup> and rs28929474 (p.Glu366Lys) in *SERPINA1*  
379 for chronic obstructive pulmonary disease (COPD)<sup>63,64</sup>. In addition, we observed successful fine-  
380 mapping in 2 novel loci for asthma, i) rs41286560 (p.Pro558Thr) in *RTL1*, a missense variant  
381 known for decreasing height<sup>65,66</sup> and ii) rs34187696 (p.Gly337Val) in *ZSCAN5A*, a known  
382 missense variant for increasing monocyte count<sup>30</sup>.

383  
384 To characterize fine-mapping failures in suspicious loci, we examined suspicious loci in which a  
385 nonsynonymous variant did not achieve the highest PIP. For example, the *FCGR2A/FCGR3A*  
386 (1q23.3) locus for COPD contained a genome-wide significant lead intergenic variant rs2099684  
387 ( $P = 1.7 \times 10^{-11}$ ) which is in LD ( $r^2 = 0.92$ ) with a missense variant rs396991 (p.Phe176Val) of  
388 *FCGR3A* (**Fig. 6d**). This locus was not previously reported for COPD, but is known for  
389 associations with autoimmune diseases (e.g., inflammatory bowel disease<sup>44</sup>, rheumatoid  
390 arthritis<sup>7</sup>, and systemic lupus erythematosus<sup>67</sup>) and encodes the low-affinity human FC-gamma  
391 receptors that bind to the Fc region of IgG and activate immune responses<sup>68</sup>. Notably, this locus  
392 contains copy number variations that contribute to the disease associations in addition to single-  
393 nucleotide variants, which makes genotyping challenging<sup>68,69</sup>. Despite strong LD with the lead  
394 variant, rs396991 did not achieve genome-wide significance ( $P = 9.1 \times 10^{-3}$ ), showing a significant  
395 deviation from the expected association ( $P_{\text{DENTIST-S}} = 5.3 \times 10^{-41}$ ; **Fig. 6e**). This is primarily due to  
396 missingness of rs396991 in 8 biobanks out of 17 ( $N_{\text{eff}} = 76,790$  and 36,781 for rs2099684 and  
397 rs396991, respectively; **Fig. 6f**), which is caused by its absence from major imputation reference  
398 panels (e.g., 1000GP<sup>49</sup>, HRC<sup>50</sup>, and UK10K<sup>70</sup>) despite having a high MAF in every population  
399 (MAF = 0.24–0.34 in African, admixed American, East Asian, European, and South Asian  
400 populations of gnomAD<sup>57</sup>).

401  
402 Sample size imbalance across variants was pervasive in the GBMI meta-analyses<sup>71</sup>, and was  
403 especially enriched in predicted suspicious loci—84% of suspicious loci vs. 24% of non-  
404 suspicious loci showed a maximum/minimum effective sample size ratio  $> 2$  among variants in  
405 LD ( $r^2 > 0.6$ ) with lead variants (a median ratio = 4.2 and 1.2 in suspicious and non-suspicious  
406 loci, respectively; **Fig. S11**). These observations are consistent with our simulations,  
407 recapitulating that sample size imbalance results in miscalibration for meta-analysis fine-mapping.  
408 Notably, we observed a similar issue in other GBMI downstream analyses (e.g., polygenic risk  
409 score [PRS]<sup>71</sup> and drug discovery<sup>72</sup>), where predictive performance improved significantly after  
410 filtering out variants with maximum  $N_{\text{eff}} < 50\%$ . Although fine-mapping methods cannot simply  
411 take this approach because it inevitably reduces calibration and recall by removing true causal  
412 variants, other meta-analysis downstream analyses that primarily rely on polygenic signals rather  
413 than individual variants should consider this filtering as an extra QC step.

414

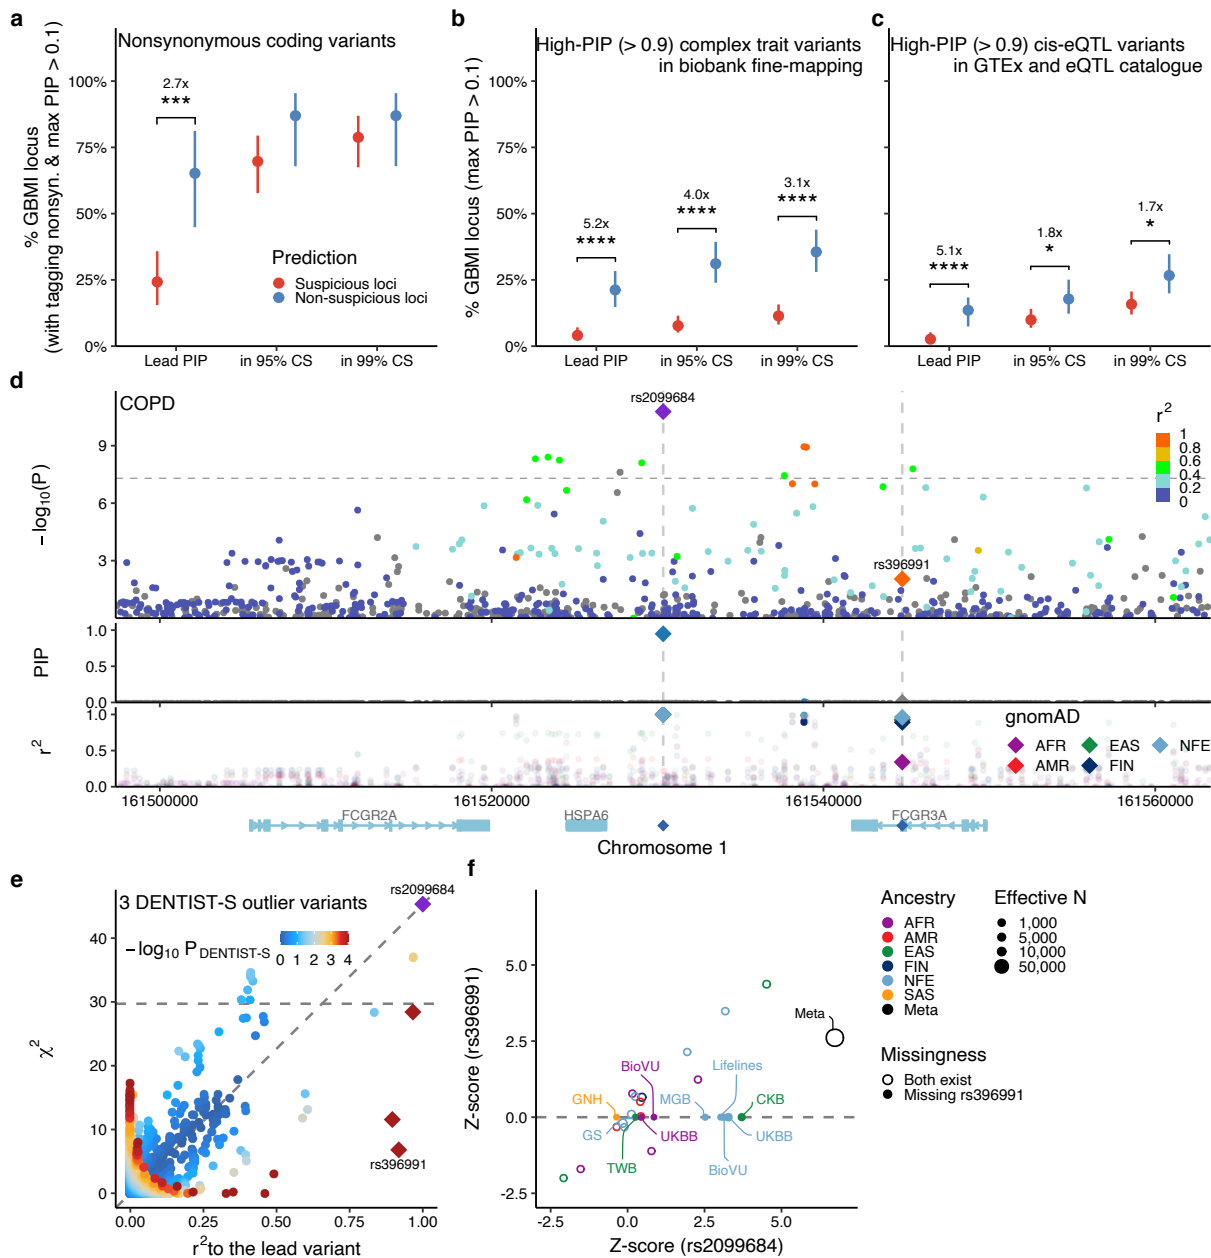

415  
416  
417  
418  
419  
420  
421  
422  
423  
424  
425  
426  
427  
428  
429  
430  
431

**Fig. 6 | Evaluation of SLALOM performance in the GBMI summary statistics.** a–c. Similar to Fig. 4, we evaluated whether (a) nonsynonymous coding variants (pLoF and missense), (b) high-PIP (> 0.9) complex trait variants in biobank fine-mapping, and (c) high-PIP (> 0.9) cis-eQTL variants in GTEx v8 and eQTL Catalogue were lead PIP variants, in 95% CS, or in 99% CS in suspicious vs. non-suspicious loci. Depletion was calculated by relative risk (i.e. a ratio of proportions; **Methods**). Error bars correspond to 95% confidence intervals using bootstrapping. Significance represents a Fisher's exact test  $P$ -value (\*,  $P < 0.05$ ; \*\*,  $P < 0.01$ ; \*\*\*,  $P < 0.001$ ; \*\*\*\*,  $P < 10^{-4}$ ). d. Locuszoom plot of the 1q23.3 locus for COPD. The top panel shows a Manhattan plot, where the lead variant rs2099684 (purple diamond) and a missense variant rs396991 (orange diamond) are highlighted. Color represents  $r^2$  values to the lead variant. Horizontal line represents a genome-wide significance threshold ( $P = 5.0 \times 10^{-8}$ ). The middle panel shows PIP from ABF fine-mapping. Color represents whether variants belong to a 95% CS. The bottom panel shows  $r^2$  values with the lead variant in gnomAD populations. e. A diagnosis plot showing  $r^2$  values to the lead variant vs. marginal  $\chi^2$ . Color represents  $-\log_{10} P_{\text{DENTIST-S}}$  values. Outlier variants with  $P_{\text{DENTIST-S}} < 10^{-4}$  are depicted in red with a diamond shape. Diagonal line represents an expected marginal association. Horizontal line represents a genome-wide significance threshold. f. Z-scores of the lead variant (rs2099684) vs. the missense variant (rs396991) in the constituent cohorts of the meta-analysis. Open and closed circles represent whether both variants exist in a cohort or rs396991 is missing. Circle size corresponds to an effective sample size. Color represents genetic ancestry.



## 432 **Comparison of fine-mapping results between the GBMI meta-analyses and individual** 433 **biobanks**

434 Motivated by successful validation of SLALOM performance, we investigated whether fine-  
435 mapping confidence and resolution were improved in the GBMI meta-analyses over individual  
436 biobanks. To this end, we used our fine-mapping results<sup>16,17</sup> of nine disease endpoints (asthma<sup>64</sup>,  
437 COPD<sup>64</sup>, gout, heart failure<sup>73</sup>, IPF<sup>62</sup>, primary open angle glaucoma<sup>74</sup>, thyroid cancer, stroke<sup>75</sup>, and  
438 venous thromboembolism<sup>76</sup>) in BBJ<sup>58</sup>, FinnGen<sup>20</sup>, and UKBB<sup>19</sup> Europeans that also contributed to  
439 the GBMI meta-analyses for the same traits.

440  
441 To perform an unbiased comparison of PIP between the GBMI meta-analysis and individual  
442 biobanks, we investigated functional enrichment of fine-mapped variants based on top PIP  
443 rankings in the GBMI and individual biobanks (top 0.5%, 0.1%, and 0.05% PIP variants in the  
444 GBMI vs. maximum PIP across BBJ, FinnGen, and UKBB; **Methods**). Previous studies have  
445 shown that high-PIP ( $> 0.9$ ) complex trait variants are significantly enriched for well-known  
446 functional categories, such as coding (pLoF, missense, and synonymous), 5'/3' UTR, promoter,  
447 and *cis*-regulatory element (CRE) regions (DNase I hypersensitive sites [DHS] and H3K27ac)<sup>16,17</sup>.  
448 Using these functional categories, we found no significant enrichment of variants in the top PIP  
449 rankings in the GBMI over individual biobanks (Fisher's exact  $P > 0.05$ ; **Fig. 7a**) except for variants  
450 in the promoter region (1.8x; Fisher's exact  $P = 4.9 \times 10^{-4}$  for the top 0.1% PIP variants). We  
451 observed similar trends regardless of whether variants were in suspicious or non-suspicious loci  
452 (**Fig. 7b,c**). To examine patterns of increased and decreased PIP for individual variants, we also  
453 calculated PIP difference between the GBMI and individual biobanks, defined as  $\Delta\text{PIP} = \text{PIP}$   
454 (GBMI) – maximum PIP across BBJ, FinnGen, and UKBB (**Fig. S12,13**). We investigated  
455 functional enrichment based on  $\Delta\text{PIP}$  bins and observed inconsistent enrichment results using  
456 different  $\Delta\text{PIP}$  thresholds (**Fig. S14**). Finally, to test whether fine-mapping resolution was  
457 improved in the GBMI over individual biobanks, we compared the size of 95% CS after restricting  
458 them to cases where a GBMI CS overlapped with an individual biobank CS from BBJ, FinnGen,  
459 or UKBB (**Methods**). We observed the median 95% CS size of 2 and 2 in non-suspicious loci for  
460 the GBMI and individual biobanks, respectively, and 5 and 14 in suspicious loci, respectively (**Fig.**  
461 **S15**). The smaller credible set size in suspicious loci in GBMI could be due to improved resolution  
462 or to increased miscalibration. These results provide limited evidence of overall fine-mapping  
463 improvement in the GBMI meta-analyses over what is achievable by taking the best result from  
464 individual biobanks.

465  
466 Individual examples, however, provide insights into the types of fine-mapping differences that can  
467 occur. To characterize the observed differences in fine-mapping confidence and resolution, we  
468 further examined non-suspicious loci with  $\Delta\text{PIP} > 0.5$  in asthma. In some cases, the increased  
469 power and/or ancestral diversity of GBMI led to improved fine-mapping: for example, an intergenic  
470 variant rs1888909 (~18 kb upstream of *IL33*) showed  $\Delta\text{PIP} = 0.99$  (PIP = 1.0 and 0.008 in GBMI  
471 and FinnGen, respectively; **Fig. 7d**), which was primarily owing to increased association  
472 significance in a meta-analysis ( $P = 3.0 \times 10^{-86}$ ,  $7.4 \times 10^{-2}$ ,  $3.6 \times 10^{-16}$ , and  $1.9 \times 10^{-53}$  in GBMI,  
473 BBJ, FinnGen, and UKBB Europeans, respectively) as well as a shorter LD length in the African  
474 population than in the European population (LD length = 4 kb vs. 41 kb for variants with  $r^2 > 0.6$   
475 with rs1888909 in the African and European populations, respectively;  $N_{\text{eff}} = 4,270$  for Africans in  
476 the GBMI asthma meta-analysis; **Fig. S16**). This variant was also fine-mapped for eosinophil  
477 count in UKBB Europeans (PIP = 1.0;  $P = 1.3 \times 10^{-314}$ )<sup>16</sup> and was previously reported to regulate  
478 *IL33* gene expression in human airway epithelial cells via allele-specific transcription factor  
479 binding of OCT-1 (POU2F1)<sup>77</sup>. Likewise, we observed a missense variant rs16903574  
480 (p.Phe319Leu) in *OTULINL* showed  $\Delta\text{PIP} = 0.79$  (PIP = 1.0 and 0.21 in GBMI and UKBB

481 Europeans, respectively; **Fig. 7e**) owing to improved association significance ( $P = 7.7 \times 10^{-15}$  and  
482  $4.7 \times 10^{-12}$  in GBMI and UKBB Europeans, respectively).

483  
484 However, we also observed very high  $\Delta$ PIP for variants that are not likely causal. For example,  
485 we observed that an intronic variant rs1295686 in *IL13* showed  $\Delta$ PIP = 0.56 (PIP = 0.56 and  
486 0.0002 in GBMI and UKBB Europeans, respectively; **Fig. 7f**), despite having strong LD with a  
487 nearby missense variant rs20541 (p.Gln144Arg;  $r^2 = 0.96$  with rs1295686) which only showed  
488  $\Delta$ PIP = 0.13 (PIP = 0.13 and 0.0001 in GBMI and UKBB Europeans, respectively). The missense  
489 variant rs20541 showed PIP = 0.23 and 0.15 for a related allergic disease, atopic dermatitis, in  
490 BBJ and FinnGen, respectively<sup>17</sup>, and was previously shown to induce STAT6 phosphorylation  
491 and up-regulate CD23 expression in monocytes, promoting IgE synthesis<sup>78</sup>. Although the GBMI  
492 meta-analysis contributed to prioritizing these two variants (sum of PIP = 0.69 vs. 0.0003 in GBMI  
493 and UKBB Europeans, respectively), the observed  $\Delta$ PIP was higher for rs1295686 than for  
494 rs20541.

495  
496 While increasing sample size in meta-analysis improves association significance, we also found  
497 negative  $\Delta$ PIP due to losing the ability to model multiple causal variants. A stop-gained variant  
498 rs61816761 (p.Arg501Ter) in *FLG* showed  $\Delta$ PIP = -1.0 (PIP =  $6.4 \times 10^{-5}$  and 1.0 in GBMI and  
499 UKBB Europeans, respectively; **Fig. 7g**), which was primarily owing to a nearby lead variant  
500 rs12123821 (~17 kb downstream of *HRNR*;  $r^2 = 0.0$  with rs61816761). This lead variant  
501 rs12123821 showed greater significance than rs61816761 in GBMI ( $P = 9.3 \times 10^{-16}$  and  $2.0 \times 10^{-$   
502  $11$  for rs12123821 and rs61816761, respectively) as well as in UKBB Europeans ( $P = 7.1 \times 10^{-26}$   
503 and  $1.5 \times 10^{-18}$ ). While our biobank fine-mapping<sup>16,17</sup> assigned PIP = 1.0 for both variants based  
504 on multiple causal variant fine-mapping (*i.e.*, FINEMAP<sup>21</sup> and SuSiE<sup>23</sup>), our ABF fine-mapping in  
505 the GBMI meta-analysis was only able to assign PIP = 0.74 for the lead variant rs12123821 due  
506 to a single causal variant assumption. This recapitulates the importance of multiple causal variant  
507 fine-mapping in complex trait fine-mapping<sup>16,17</sup>—however, we note that multiple causal variant  
508 fine-mapping with an external LD reference is extremely error-prone as previously reported<sup>14–16</sup>.

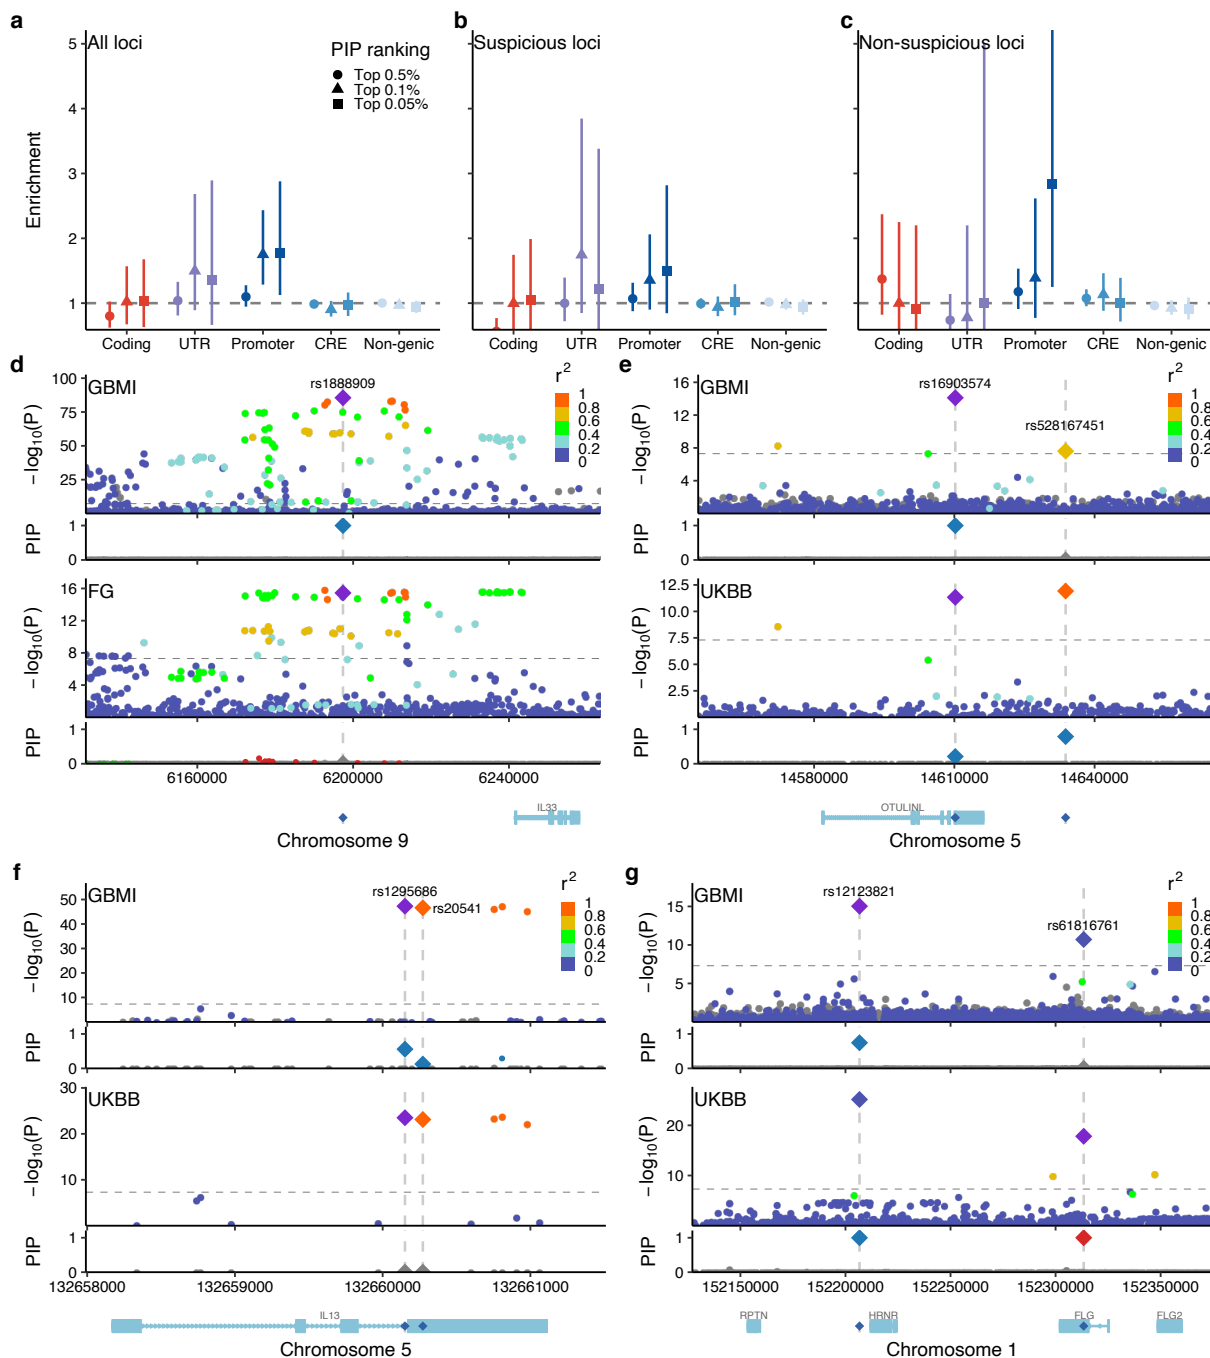

509  
 510 **Fig. 7 | Fine-mapping improvement and retrogression in the GBMI meta-analyses over individual biobanks.** a–  
 511 c. Functional enrichment of variants in each functional category based on top PIP rankings in the GBMI and individual  
 512 biobanks (maximum PIP of BBJ, FinnGen, and UKBB). Shape corresponds to top PIP ranking (top 0.5%, 0.1%, and  
 513 0.05%). Enrichment was calculated by a relative risk (*i.e.* a ratio of proportions; **Methods**). Error bars correspond to  
 514 95% confidence intervals using bootstrapping. **d–g**. Locuszoom plots for the same non-suspicious locus of asthma in  
 515 the GBMI meta-analysis and an individual biobank (BBJ, FinnGen, or UKBB Europeans) that showed the highest PIP  
 516 in our biobank fine-mapping. Colors in the Manhattan panels represent  $r^2$  values to the lead variant. In the PIP panels,  
 517 only fine-mapped variants in the 95% CS are colored, where the same colors are applied between the GBMI meta-  
 518 analysis and an individual biobank based on merged CS as previously described. Horizontal line represents a genome-  
 519 wide significance threshold ( $P = 5.0 \times 10^{-8}$ ). **d**. rs1888909 for asthma in the GBMI and FinnGen. **e**. rs16903574 for  
 520 asthma in the GBMI and UKBB Europeans. Nearby rs528167451 was also highlighted, which was in strong LD ( $r^2 =$   
 521 0.86) and in the same 95% CS in UKBB Europeans, but not in the GBMI ( $r^2 = 0.67$ ).

522 GBMI and UKBB Europeans. A nearby missense, rs20541, showed lower PIP than rs1295686 despite having strong  
523 LD ( $r^2 = 0.96$ ). g. rs12123821 for asthma in the GBMI and UKBB Europeans. Nearby stop-gained rs61816761 was  
524 independent of rs12123821 ( $r^2 = 0.0$ ) and not fine-mapped in the GBMI due to a single causal variant assumption in  
525 the ABF fine-mapping.  
526

## 527 Discussion

528 In this study, we first demonstrated in simulations that meta-analysis fine-mapping is substantially  
529 miscalibrated when constituent cohorts are heterogeneous in phenotyping, genotyping, and  
530 imputation. To mitigate this issue, we developed SLALOM, a summary statistics-based QC  
531 method for identifying suspicious loci in meta-analysis fine-mapping. Applying SLALOM to 14  
532 disease endpoints from the GBMI meta-analyses<sup>10</sup> as well as 467 summary statistics from the  
533 GWAS Catalog<sup>48</sup>, we observed widespread suspicious loci in meta-analysis summary statistics,  
534 suggesting that meta-analysis fine-mapping is often miscalibrated in real data too. Indeed, we  
535 demonstrated that the predicted suspicious loci were significantly depleted for having likely causal  
536 variants as a lead PIP variant, such as nonsynonymous variants, high-PIP ( $> 0.9$ ) GWAS and cis-  
537 eQTL fine-mapped variants from our previous fine-mapping studies<sup>16,17</sup>. Our method provides  
538 better calibration in non-suspicious loci for meta-analysis fine-mapping, generating a more reliable  
539 set of variants for further functional characterization.  
540

541 We have found limited evidence of improved fine-mapping in the GBMI meta-analyses over  
542 individual biobanks. A few empirical examples in this study as well as other previous  
543 studies<sup>7,9,26,27,30</sup> suggested that multi-ancestry, large-scale meta-analysis could have potential to  
544 improve fine-mapping confidence and resolution owing to increased statistical power in  
545 associations and differential LD pattern across ancestries. However, we have highlighted that the  
546 observed improvement in PIP could be due to sample size imbalance in a locus, miscalibration,  
547 and technical confoundings too, which further emphasizes the importance of careful investigation  
548 of fine-mapped variants identified through meta-analysis fine-mapping. Given practical challenges  
549 in data harmonization across different cohorts, a large-scale biobank with multiple ancestries  
550 (e.g., UK Biobank<sup>19</sup> and All of Us<sup>79</sup>) would likely benefit the most from meta-analysis fine-mapping  
551 across ancestries.  
552

553 As high-confidence fine-mapping results in large-scale biobanks and molecular QTLs continue to  
554 become available<sup>16,17,60</sup>, we propose alternative approaches for prioritizing candidate causal  
555 variants in a meta-analysis. First, these high-confidence fine-mapped variants have been a  
556 valuable resource to conduct a “PheWAS”<sup>16</sup> to match with associated variants in a meta-analysis,  
557 which provides a narrower list of candidate variants assuming they would equally be functional  
558 and causal in related complex traits or tissues/cell-types. Second, a traditional approach based  
559 on tagging variants (e.g.,  $r^2 > 0.6$  with lead variants, or PICS<sup>80</sup> fine-mapping approach that only  
560 relies on a lead variant and LD) can be still highly effective, especially for known functional  
561 variants such as nonsynonymous coding variants. As we highlighted in this and previous<sup>39</sup>  
562 studies, potentially causal variants in strong LD with lead variants might not achieve genome-  
563 wide significance because of missingness and heterogeneity.  
564

565 While using an external LD reference for fine-mapping has been shown to be extremely error-  
566 prone<sup>14–16</sup>, we find here that it can be useful for flagging suspicious loci, even when it does not  
567 perfectly represent the in-sample LD structure of the meta-analyzed individuals. However, our  
568 use of external LD reference comes with several limitations. For example, due to the finite sample  
569 size of external LD reference, rare or low-frequency variants have larger uncertainties around  $r^2$   
570 than common variants. Moreover, our  $r^2$  values in a multi-ancestry meta-analysis are currently

571 approximated based on a sample-size-weighted average of  $r^2$  across ancestries as previously  
572 suggested<sup>81</sup>, but this can be different from actual  $r^2$ . These uncertainties around  $r^2$  affect SLALOM  
573 prediction performance and should be modeled appropriately for further method development. On  
574 the other hand, we find it challenging to use a LD reference when true causal variants are located  
575 within a complex region (e.g., major histocompatibility complex [MHC]), or are entirely missing  
576 from standard LD or imputation reference panels, especially for structural variants. These  
577 limitations are not specific to meta-analysis fine-mapping, and separate fine-mapping methods  
578 based on bespoke imputation references have been developed (e.g., HLA<sup>82</sup>, KIR<sup>83</sup>, and variable  
579 numbers of tandem repeats [VNTR]<sup>84</sup>).

580  
581 In addition, there are several methodological limitations of SLALOM. First, our simulations only  
582 include one causal variant per locus. Although additional independent causal variants would not  
583 affect SLALOM precision (but decrease recall), multiple *correlated* causal variants in a locus  
584 would violate SLALOM assumptions and could lead to some DENTIST-S outliers that are not due  
585 to heterogeneity or missingness but rather simply a product of tagging multiple causal variants in  
586 LD. In fact, our previous studies have illustrated infrequent but non-zero presence of such  
587 correlated causal variants in complex traits<sup>16,17</sup>. Second, SLALOM prediction is not perfect.  
588 Although fine-mapping calibration is certainly better in non-suspicious vs. suspicious loci,  
589 SLALOM has low precision, and we still observe some miscalibration in non-suspicious loci.  
590 Optimal thresholds for SLALOM prediction might be different for other datasets. Third, SLALOM  
591 does not model effect size heterogeneity. Although SLALOM is able to detect suspicious loci due  
592 to effect size heterogeneity as the method is agnostic to the source of heterogeneity, methods  
593 which model effect size heterogeneity, such as MR-MEGA<sup>85</sup>, could improve SLALOM  
594 performance. Finally, SLALOM is a per-locus QC method and does not calibrate per-variant PIPs.  
595 Further methodological development that properly models heterogeneity, missingness, sample  
596 size imbalance, multiple causal variants, and LD uncertainty across multiple cohorts and  
597 ancestries is needed to refine per-variant calibration and recall in meta-analysis fine-mapping.

598  
599 We have found evidence in our simulations and real data of severe miscalibration of fine-mapping  
600 results from GWAS meta-analysis; for example, we estimate that the difference between true and  
601 reported proportion of causal variants is 20% and 45% for high-PIP ( $> 0.9$ ) variants in suspicious  
602 loci from the simulations and the GWAS Catalog, respectively. Our SLALOM method helps to  
603 exclude spurious results from meta-analysis fine-mapping; however, even fine-mapping results in  
604 SLALOM-predicted “non-suspicious” loci remain somewhat miscalibrated, showing estimated  
605 differences between true and reported proportion of causal variants of 4% and 15% for high-PIP  
606 variants in the simulations and the GWAS Catalog, respectively. We thus urge extreme caution  
607 when interpreting PIPs computed from meta-analyses until improved methods are available. We  
608 recommend that researchers looking to identify likely causal variants employ complete  
609 synchronization of study design, case/control ascertainment, genomic profiling, and analytical  
610 pipeline, or rely more heavily on functional annotations, biobank fine-mapping, or molecular QTLs.  
611



## 612 **Acknowledgements**

613 We acknowledge all the participants and researchers of the 23 biobanks that have contributed to  
614 the GBMI. Biobank-specific acknowledgements are included in the **Supplementary Note**. We  
615 thank H. Huang, A.R. Martin, B.M. Neale, Y. Okada, K. Tsoo, J.C. Ulirsch, Y. Wang, and all the  
616 members of Finucane and Daly labs for their helpful feedback. M.K. was supported by a Nakajima  
617 Foundation Fellowship and the Masason Foundation. H.K.F. was funded by NIH grant DP5  
618 OD024582.

## 619 **Author contributions**

620 M.K., M.J.D, and H.K.F. designed the study. M.K., R.E. and W.Z. performed analyses. H.K.F  
621 supervised this work. H.K.F. and M.K. obtained funding. M.K., R.E., M.J.D., and H.K.F. wrote the  
622 manuscript with input from all authors.

## 623 **Competing interests**

624 M.J.D. is a founder of Maze Therapeutics. All other authors declare no competing interests.

## 625 **STAR Methods**

## 626 **Resource availability**

## 627 **Lead contact**

628 Further information and requests for resources and data should be directed to and will be fulfilled  
629 by the lead contact, Masahiro Kanai ([mkanai@broadinstitute.org](mailto:mkanai@broadinstitute.org)).

## 630 **Materials availability**

631 This study did not generate new unique reagents.

## 632 **Data and code availability**

633 The GBMI summary statistics for the 14 endpoints are publicly available and are browserble at  
634 the GBMI PheWeb website (<http://results.globalbiobankmeta.org/>). Example outputs from the  
635 meta-analysis fine-mapping simulation pipeline have been deposited at Harvard Dataverse. All  
636 original code has been deposited at Zenodo and is publicly available as of the date of publication.  
637 DOIs and links are listed in the key resources table. Any additional information required to  
638 reanalyze the data reported in this paper is available from the lead contact upon request.

## 639 **Method details**

## 640 **Meta-analysis fine-mapping simulation**

641 To benchmark fine-mapping performance in meta-analysis, we simulated a large-scale, realistic  
642 GWAS meta-analysis and performed fine-mapping under different scenarios. An overview of our  
643 simulation pipeline is summarized in **Fig. S2**.

#### 644 *Simulated true genotype*

645 Using HAPGEN2<sup>87</sup> with the 1000 Genomes Project Phase 3 reference<sup>49</sup>, we simulated “true”  
646 genotypes of chromosome 3 for multiple independent cohorts from African, East Asian, and  
647 European ancestries. For each independent cohort from a given ancestry, we simulated 10,000  
648 individuals each using the default parameters, with an ancestry-specific effective population size  
649 set to 17,469, 14,269, and 11,418 for Africans, East Asians, and Europeans, respectively, as  
650 recommended<sup>87</sup>. To mimic sample size imbalance of different ancestries in the current meta-  
651 analyses, we simulated 10 independent European cohorts, 1 African cohort, and 1 East Asian  
652 cohort.

653  
654 To restrict our analysis to unrelated samples, we computed sample relatedness based on KING  
655 kinship coefficients<sup>88</sup> using PLINK 2.0 (ref. <sup>89</sup>) and removed monozygotic twins, duplicated  
656 individuals, or first-degree relatives with the coefficient threshold of 0.177. The detailed sample  
657 sizes of unrelated individuals for each cohort is summarized in **Table S1**.

#### 658 *Genotyping and imputation*

659 To simulate realistic genotyping and imputation procedures, we first virtually genotyped each  
660 cohort by restricting variants to those that are available on different genotyping arrays. We  
661 selected three major genotyping arrays from Illumina, Inc. (Omni2.5, Multi-Ethnic Global Array  
662 [MEGA], and Global Screening Array [GSA]) that have different densities of genotyping probes  
663 (**Table S2**). For each cohort, we created three virtually genotyped datasets by retaining variants  
664 that are genotyped on each array. For the sake of simplicity, we assumed no genotyping errors  
665 occurred between true genotypes and virtually genotyped data—however, in practice, genotyping  
666 error is one of the major sources of unexpected confounding (e.g., see recent discussions  
667 here<sup>90,91</sup>) and should be treated carefully.

668  
669 For each pair of cohort and genotyping array, we then imputed missing variants using different  
670 imputation reference panels. We used the Michigan Imputation Server  
671 (<https://imputationserver.sph.umich.edu/>)<sup>92</sup> and the TOPMed Imputation Server  
672 (<https://imputation.biodatacatalyst.nhlbi.nih.gov/>)<sup>51</sup> with the default parameters, using three  
673 publicly available reference panels: the 1000 Genomes Project Phase 3 (version 5;  $n = 2,504$ ;  
674 1000GP3)<sup>49</sup>, the Haplotype Reference Consortium (version r1.1;  $n = 32,470$ ; HRC)<sup>50</sup>, and the  
675 TOPMed (version R2;  $n = 97,256$ )<sup>51</sup>. Briefly, for each input, the imputation server created chunks  
676 of 20 Mb, applied the standard QC, pre-phased each chunk with Eagle2 (ref. <sup>93</sup>), and imputed  
677 non-genotyped variants using a specified reference panel with Minimac4  
678 (<https://genome.sph.umich.edu/wiki/Minimac4>). The detailed documentation of the imputation  
679 pipeline is available on the Michigan and TOPMed websites and has been described elsewhere<sup>92</sup>.

680  
681 We applied post-imputation QC by only keeping variants with  $MAF > 0.001$  and imputation  $Rsq >$   
682  $0.6$ . Because the TOPMed panel is based on GRCh38 while the 1000GP3 and the HRC panels  
683 are on GRCh37, we lifted over TOPMed variants from GRCh38 to GRCh37 to meta-analyze with  
684 other cohorts. We excluded any variants which were lifted over to different chromosomes or for  
685 which the conversion failed. The number of virtually genotyped and imputed variants for each  
686 combination of cohort, genotyping array, and imputation panel is summarized in **Table S3**.

#### 687 *True phenotype*

688 We simulated 300 true phenotypes that resemble observed complex trait genetic architecture and  
689 phenotypic heterogeneity across cohorts. Based on previous literature, we set parameters as  
690 follows: 1) 50% of 1 Mb loci contain a true causal variant<sup>94</sup>; 2) probability of being causal is

691 proportional to functional enrichments of variant consequences (pLoF, missense, synonymous,  
692 5'/3' UTR, promoter, cis-regulatory region, and non-genic) for fine-mapped variants as estimated  
693 in a previous complex trait fine-mapping study<sup>17</sup>; 3) per-allele causal effect sizes have a variance  
694 proportional to  $[2p(1-p)]^\alpha$  where  $p$  represents a maximum MAF across the three ancestries  
695 (AFR, EAS, and EUR) and  $\alpha$  is set to be  $-0.38$  (ref. <sup>52</sup>); and 4) total SNP-heritability  $h_g^2$  for  
696 chromosome 3 equals 0.03 (ref. <sup>53</sup>). For the sake of simplicity, we randomly draw a single true  
697 causal variant per locus because ABF assumes a single causal variant<sup>31,32</sup>. We draw true causal  
698 variants from 1,150,893 non-ambiguous single-nucleotide variants in 1000GP3 that showed MAF  
699  $> 0.01$  in at least one of the three ancestries (AFR, EAS, or EUR) and were not located within  
700 conversion-unstable positions (CUP)<sup>54</sup> between the human genome builds GRCh37 and  
701 GRCh38. To mimic phenotypic heterogeneity across cohorts in real-world meta-analysis (due to  
702 e.g., different ascertainment, measurement error, or true effect size heterogeneity), we introduced  
703 cross-cohort genetic correlation of true effect sizes  $r_g$  which is set to be one of 1, 0.9, or 0.5. For  
704 a true causal variant  $j$ , true causal effect sizes  $\beta_j$  across cohorts were randomly drawn from  $\beta_j \sim$   
705  $MVN(0, \Sigma)$  where diagonal elements of  $\Sigma$  were set to be  $\sigma_g^2 \cdot [2p(1-p)]^\alpha$  and off-diagonal  
706 elements of  $\Sigma$  were set to be  $r_g \cdot \sigma_g^2 \cdot [2p(1-p)]^\alpha$ .  $\sigma_g^2$  was determined by  $\sigma_g^2 = h_g^2 /$   
707  $\sum_j [2p(1-p)]^{1+\alpha}$ . For each cohort, true phenotype  $y$  was computed via  $y = X\beta + \varepsilon$  where  $X$   
708 is the above true genotype matrix from HAPGEN2 and  $\varepsilon_i \sim N(0, 1 - \sigma_g^2)$  i.i.d. We simulated 100  
709 true phenotypes for each of  $r_g = 1, 0.9, \text{ and } 0.5$ , respectively.

## 710 GWAS

711 For each combination of phenotype, cohort, genotyping chip, and imputation panel, we conducted  
712 GWAS via a standard linear regression as implemented in PLINK 2.0 using imputed dosages. For  
713 covariates, we included top 10 principal components that were calculated based on true  
714 genotypes after restricting to unrelated samples. We only used LD-pruned variants with MAF  $>$   
715 0.01 for PCA.

## 716 Meta-analysis

717 To simulate meta-analyses that resemble real-world settings, we generated multiple  
718 *configurations* of the above GWAS results to meta-analyze across 10 independent cohorts.  
719 Briefly, we chose configurations based on the following settings: 1) 10 EUR cohorts are genotyped  
720 and imputed using the same genotyping array (one of GSA, MEGA, or Omni2.5) and the same  
721 imputation panel (one of 1000GP3, HRC, TOPMed, or TOPMed-liftover); 2) 10 cohorts consisting  
722 of multiple ancestries (9 EUR + 1 AFR/EAS cohorts or 8 EUR + 1 AFR + 1 EAS cohorts), with all  
723 cohorts genotyped and imputed using the same array (Omni2.5) and the same panel (1000GP3);  
724 3) 10 EUR or multi-ancestry cohorts are genotyped using the same array (Omni2.5) but imputed  
725 using different panels across cohorts; 4) 10 EUR or multi-ancestry cohorts are imputed using the  
726 same panel (1000GP3) but genotyped using different arrays across cohorts; 5) 10 EUR or multi-  
727 ancestry cohorts are genotyped and imputed using different arrays and panels across cohorts.  
728 For settings 3–5, we randomly draw a combination of a genotyping array and an imputation panel  
729 for each cohort five times each for 10 EUR and multi-ancestry cohorts. In total, we generated 45  
730 configurations as summarized in **Table S4**.

731  
732 For each configuration, we conducted a fixed-effect meta-analysis based on inverse-variance  
733 weighted betas and standard errors using a modified version of PLINK 1.9  
734 ([https://github.com/mkanai/plink-ng/tree/add\\_se\\_meta](https://github.com/mkanai/plink-ng/tree/add_se_meta)).

### 735 *Fine-mapping*

736 For each meta-analysis, we defined fine-mapping regions based on a 1 Mb window around each  
737 genome-wide significant lead variant and applied ABF<sup>31,32</sup> using prior effect size variance of  $\sigma_0^2 =$   
738 0.04. We set a prior variance of effect size to be 0.04 which was taken from Wakefield et al.<sup>31</sup> and  
739 is commonly used in meta-analysis fine-mapping studies<sup>2,7</sup>. We computed posterior inclusion  
740 probability (PIP) and 95% credible set (CS) for each locus and evaluated whether true causal  
741 variants were correctly fine-mapped.

### 742 **The SLALOM method**

743 SLALOM takes GWAS summary statistics and external LD reference as input and predicts  
744 whether a locus is suspicious for fine-mapping. SLALOM consists of the following three steps:

#### 745 *Locus definition*

746 Consistent with common fine-mapping region definition, we defined loci based on a 1 Mb window  
747 around each genome-wide significant lead variant and merged them if they overlapped. We  
748 excluded the major histocompatibility complex (MHC) region (chr 6: 25-36 Mb) from analysis due  
749 to extensive LD structure in the region.

#### 750 *DENTIST-S outlier detection*

751 For each variant in a locus, we computed DENTIST-S statistics using equation (1) based on the  
752 assumption of a single causal variant. DENTIST-S P-values ( $P_{\text{DENTIST-S}}$ ) were computed using the  
753  $\chi^2$  distribution with 1 degree of freedom. We applied ABF<sup>31,32</sup> using prior effect size variance of  
754  $\sigma_0^2 = 0.04$  and used the lead PIP variant (the variant with the highest PIP) as an approximation of  
755 the causal variant in the locus. To retrieve correlation  $r$  among the variants, we used publicly  
756 available LD matrices from gnomAD<sup>57</sup> v2 as external LD reference for African, Admixed American,  
757 East Asian, Finnish, and non-Finnish European populations. When multiple populations exist, we  
758 computed a sample-size-weighted average of  $r^2$  using per-variant sample sizes for each  
759 population as previously suggested<sup>81</sup>. We excluded variants without  $r^2$  available in gnomAD from  
760 the analysis. Since gnomAD v2 LD matrices are based on the human genome assembly GRCh37,  
761 variants were lifted over to GRCh38 if the input summary statistics were based on GRCh38.

762  
763 We determined DENTIST-S outlier variants using two thresholds: 1)  $r^2 > \rho$  to the lead and 2)  
764  $P_{\text{DENTIST-S}} < \tau$ . The thresholds  $\rho$  and  $\tau$  were set to  $\rho = 0.6$  and  $\tau = 1.0 \times 10^{-4}$  based on the training  
765 in simulations as described below.

#### 766 *Suspicious loci prediction*

767 We predicted whether a locus is suspicious or non-suspicious for fine-mapping based on the  
768 number of DENTIST-S outlier variants in the locus  $> \kappa$ . To determine the best-performing  
769 thresholds ( $\rho$ ,  $\tau$ , and  $\kappa$ ), we used loci with maximum PIP  $> 0.9$  in the simulations for training.  
770 Positive conditions were defined as whether a true causal variant in a locus is 1) a lead PIP  
771 variant, 2) in 95% CS, and 3) in 99% CS. We computed AUROC across different thresholds ( $\rho =$   
772 0, 0.1, 0.2, ..., 0.9;  $-\log_{10} \tau = 0, 0.5, 1, \dots, 10$ ; and  $\kappa = 0, 1, 2, \dots$ ) and chose  $\rho = 0.6$ ,  $\tau = 1.0 \times 10^{-4}$ ,  
773 and  $\kappa = 0$  that showed the highest AUROC for all the aforementioned positive conditions. Using  
774 all the loci in the simulations, we then evaluated fine-mapping miscalibration (defined as mean  
775 PIP – fraction of true causal variants) at different PIP thresholds in suspicious and non-suspicious  
776 loci and decided to only apply SLALOM to loci with maximum PIP  $> 0.1$  owing to relatively lower  
777 miscalibration and specificity of SLALOM at lower PIP thresholds.

## 778 **GWAS Catalog analysis**

779 We retrieved full GWAS summary statistics publicly available on the GWAS Catalog<sup>48</sup>. Out of  
780 33,052 studies from 5,553 publications registered at the GWAS Catalog (as of January 12, 2022),  
781 we selected 467 studies from 96 publications that have 1) full harmonized summary statistics  
782 preprocessed by the GWAS Catalog with non-missing variant ID, marginal beta, and standard  
783 error columns, 2) a discovery sample size of more than 10,000 individuals, 3) African (including  
784 African American, Afro-Caribbean, and Sub-Saharan African), admixed American (Hispanic and  
785 Latin American), East Asian, or European samples based on their broad ancestral category  
786 metadata, 4) at least one genome-wide significant association ( $P < 5.0 \times 10^{-8}$ ), and 5) our manual  
787 annotation as a meta-analysis rather than a single-cohort study (**Table S6**). We applied SLALOM  
788 to the 467 summary statistics and identified 35,864 genome-wide significant loci (based on 1 Mb  
789 window around lead variants), of which 28,925 loci with maximum PIP > 0.1 were further classified  
790 into suspicious and non-suspicious loci. Since per-variant sample sizes were not available, we  
791 used overall sample sizes of each ancestry (African, Admixed American, East Asian, and  
792 European) to calculate the weighted-average of  $r^2$ . All the variants were harmonized into the  
793 human genome assembly GRCh38 by the GWAS Catalog.

## 794 **GBMI analysis**

795 We used meta-analysis summary statistics of 14 disease endpoints from the GBMI (**Table S8**).  
796 These meta-analyses were conducted using up to 1.8 million individuals across 18 biobanks for  
797 discovery, representing six different genetic ancestry groups (approximately 33,000 African,  
798 18,000 Admixed American, 31,000 Central and South Asian, 341,000 East Asian, 1.4 million  
799 European, and 1,600 Middle Eastern individuals). Detailed procedures of the GBMI meta-  
800 analyses were described in the GBMI flagship publication<sup>10</sup>.

801  
802 Across the 14 summary statistics, we used 489 out of 500 genome-wide significant loci ( $P < 5.0$   
803  $\times 10^{-8}$ ; 1 Mb window around each lead variant, as defined in the GBMI flagship publication<sup>10</sup>),  
804 excluding 11 loci that overlap with the MHC region. We applied SLALOM to 422 loci with maximum  
805 PIP > 0.1 based on the ABF fine-mapping and predicted whether they were suspicious or non-  
806 suspicious for fine-mapping. We used per-variant sample sizes of each ancestry (African,  
807 Admixed American, East Asian, Finnish, and non-Finnish European) to calculate the weighted-  
808 average of  $r^2$ . Since gnomAD LD matrices were not available for Central and South Asian and  
809 Middle Eastern, we did not use their sample sizes for the calculation. All the variants were  
810 processed on the human genome assembly GRCh38.

## 811 **Fine-mapping results of complex traits and *cis*-eQTL**

812 We retrieved our previous fine-mapping results for 1) complex traits in large-scale biobanks  
813 (BBJ<sup>58</sup>, FinnGen<sup>20</sup>, and UKBB<sup>19</sup> Europeans)<sup>16,17</sup> and 2) *cis*-eQTLs in GTEx<sup>59</sup> v8 and eQTL  
814 Catalogue<sup>60</sup>. Briefly, we conducted multiple-causal-variant fine-mapping (FINEMAP<sup>21,22</sup> and  
815 SuSiE<sup>23</sup>) of complex trait GWAS (# unique traits = 148) and *cis*-eQTL gene expression (# unique  
816 tissues/cell-types = 69) using summary statistics and in-sample LD. Detailed fine-mapping  
817 methods are described elsewhere<sup>16,17</sup>.

818  
819 In this study, we collected 1) high-PIP GWAS variants that achieved PIP > 0.9 for any traits in any  
820 biobank and 2) high-PIP *cis*-eQTL variants that achieved PIP > 0.9 for any gene expression in  
821 any tissues/cell-types. All the variants were originally processed on the human genome assembly  
822 GRCh37 and lifted over to the GRCh38 for comparison.



### 823 *Additional fine-mapping results*

824 To compare with the GBMI meta-analyses, we additionally conducted multi-causal-variant fine-  
825 mapping of four additional endpoints (gout, heart failure, thyroid cancer, and venous  
826 thromboembolism) that were not fine-mapped in our previous study<sup>16,17</sup>. We used exactly the  
827 same fine-mapping pipeline (FINEMAP<sup>21,22</sup> and SuSiE<sup>23</sup>) as described previously<sup>16,17</sup>. For UKBB  
828 Europeans, to use the exact same samples that contributed to the GBMI, we used individuals of  
829 European ancestry ( $n = 420,531$ ) as defined in the Pan-UKBB project  
830 (<https://pan.ukbb.broadinstitute.org>), instead of those of “white British ancestry” ( $n = 361,194$ )  
831 used in our previous study<sup>16,17</sup>.

### 832 **Enrichment analysis of likely causal variants**

833 To validate SLALOM performance, we asked whether suspicious and non-suspicious loci were  
834 enriched for having likely causal variants as a lead PIP variant, and for containing them in the  
835 95% and 99% CS. We defined likely causal variants using 1) nonsynonymous coding variants,  
836 *i.e.*, pLoF and missense variants annotated<sup>95</sup> by the Ensembl Variant Effect Predictor (VEP) v101  
837 (using GRCh38 and GENCODE v35), 2) the high-PIP ( $> 0.9$ ) complex trait fine-mapped variants,  
838 and 3) the high-PIP ( $> 0.9$ ) *cis*-eQTL fine-mapped variants from our previous studies as described  
839 above.

840  
841 We estimated enrichment for suspicious and non-suspicious loci as a relative risk (*i.e.*, a ratio of  
842 proportion of variants) between being in suspicious/non-suspicious loci and having the annotated  
843 likely causal variants as a lead PIP variant (or containing them in the 95% or 99% CS). That is, a  
844 relative risk = (proportion of non-suspicious loci having the annotated variants as a lead PIP  
845 variant) / (proportion of suspicious loci having the annotated variants as a lead PIP variant). We  
846 computed 95% confidence intervals using bootstrapping.

### 847 **Comparison of fine-mapping results between the GBMI and individual biobanks**

848 To directly compare with fine-mapping results from the GBMI meta-analyses, we used our fine-  
849 mapping results of nine disease endpoints (asthma<sup>64</sup>, COPD<sup>64</sup>, gout, heart failure<sup>73</sup>, IPF<sup>62</sup>, primary  
850 open angle glaucoma<sup>74</sup>, thyroid cancer, stroke<sup>75</sup>, and venous thromboembolism<sup>76</sup>) in BBJ<sup>58</sup>,  
851 FinnGen<sup>20</sup>, and UKBB<sup>19</sup> Europeans that were also part of the GBMI meta-analyses for the same  
852 traits. For comparison, we computed the maximum PIP for each variant and the minimum size of  
853 95% CS across BBJ, FinnGen, and UKBB. We restricted the 95% CS in biobanks to those that  
854 contain the lead variants from the GBMI. We defined the PIP difference between the GBMI and  
855 individual biobanks as  $\Delta\text{PIP} = \text{PIP}(\text{GBMI}) - \text{the maximum PIP across the biobanks}$ .

856  
857 We conducted functional enrichment analysis to compare between the GBMI meta-analysis and  
858 individual biobanks because unbiased comparison of PIP requires conditioning on likely causal  
859 variants independent of the fine-mapping results, and functional annotations have been shown to  
860 be enriched for causal variants. Using functional categories (coding [pLoF, missense, and  
861 synonymous], 5'/3' UTR, promoter, and CRE) from our previous study<sup>16,17</sup>, we estimated  
862 functional enrichments of variants in each functional category based on 1) top PIP rankings and  
863 2)  $\Delta\text{PIP}$  bins. Since fine-mapping PIP in the GBMI meta-analysis can be miscalibrated, we  
864 performed a comparison based on top PIP rankings to assess whether the ordering given by  
865 GBMI PIPs is more informative than the ordering given by the biobanks. For the top PIP rankings,  
866 we took the top 0.5%, 0.1%, and 0.05% variants based on the PIP rankings in the GBMI and  
867 individual biobanks. We computed enrichment as a relative risk = (proportion of top X% PIP  
868 variants in the GBMI that are in the annotation) / (proportion of top X% PIP variants in the  
869 individual biobanks that are in the annotation). For  $\Delta\text{PIP}$  bins, we defined three bins using different

870 thresholds ( $\theta = 0.01, 0.05, \text{ and } 0.1$ ): 1) decreased PIP bin,  $\Delta\text{PIP} < -\theta$ , 2) null bin,  $-\theta \leq \Delta\text{PIP} \leq \theta$ ,  
871 and 3) increased PIP bin,  $\theta < \Delta\text{PIP}$ . We computed enrichment as a relative risk = (proportion of  
872 variants in the decreased/increased PIP bin that are in the annotation) / (proportion of variants in  
873 the null PIP bin). We combined coding, UTR, and promoter categories for this analysis due to the  
874 limited number of variants for each bin.

## 875 References

- 876 1. Evangelou, E. & Ioannidis, J. P. a. Meta-analysis methods for genome-wide association  
877 studies and beyond. *Nat. Rev. Genet.* **14**, 379–389 (2013).
- 878 2. Mahajan, A. *et al.* Fine-mapping type 2 diabetes loci to single-variant resolution using high-  
879 density imputation and islet-specific epigenome maps. *Nat. Genet.* **50**, 1505–1513 (2018).
- 880 3. Spracklen, C. N. *et al.* Identification of type 2 diabetes loci in 433,540 East Asian  
881 individuals. *Nature* **582**, 240–245 (2020).
- 882 4. Ripke, S. *et al.* Biological insights from 108 schizophrenia-associated genetic loci. *Nature*  
883 **511**, 421–427 (2014).
- 884 5. The Schizophrenia Working Group of the Psychiatric Genomics Consortium, Ripke, S.,  
885 Walters, J. T. R. & O'Donovan, M. C. Mapping genomic loci prioritises genes and implicates  
886 synaptic biology in schizophrenia. *bioRxiv* (2020) doi:10.1101/2020.09.12.20192922.
- 887 6. Okada, Y. *et al.* Genetics of rheumatoid arthritis contributes to biology and drug discovery.  
888 *Nature* **506**, 376–381 (2014).
- 889 7. Ishigaki, K. *et al.* Trans-ancestry genome-wide association study identifies novel genetic  
890 mechanisms in rheumatoid arthritis. *bioRxiv* (2021) doi:10.1101/2021.12.01.21267132.
- 891 8. Locke, A. E. *et al.* Genetic studies of body mass index yield new insights for obesity  
892 biology. *Nature* **518**, 197–206 (2015).
- 893 9. Graham, S. E. *et al.* The power of genetic diversity in genome-wide association studies of  
894 lipids. *Nature* **600**, 675–679 (2021).
- 895 10. Zhou, W. *et al.* Global Biobank Meta-analysis Initiative: powering genetic discovery across  
896 human diseases. *bioRxiv* (2021) doi:10.1101/2021.11.19.21266436.
- 897 11. Visscher, P. M. *et al.* 10 Years of GWAS Discovery: Biology, Function, and Translation.  
898 *Am. J. Hum. Genet.* **101**, 5–22 (2017).
- 899 12. Shendure, J., Findlay, G. M. & Snyder, M. W. Genomic Medicine-Progress, Pitfalls, and  
900 Promise. *Cell* **177**, 45–57 (2019).
- 901 13. Schaid, D. J., Chen, W. & Larson, N. B. From genome-wide associations to candidate  
902 causal variants by statistical fine-mapping. *Nat. Rev. Genet.* **19**, 491–504 (2018).
- 903 14. Ulirsch, J. C. *et al.* Interrogation of human hematopoiesis at single-cell and single-variant  
904 resolution. *Nat. Genet.* **51**, 683–693 (2019).
- 905 15. Weissbrod, O. *et al.* Functionally informed fine-mapping and polygenic localization of  
906 complex trait heritability. *Nat. Genet.* **52**, 1355–1363 (2020).
- 907 16. Ulirsch, J. C. & Kanai, M. An annotated atlas of causal variants underlying complex traits  
908 and gene expression. *Under review*.
- 909 17. Kanai, M. *et al.* Insights from complex trait fine-mapping across diverse populations.  
910 *medRxiv* (2021) doi:10.1101/2021.09.03.21262975.
- 911 18. Nagai, A. *et al.* Overview of the BioBank Japan Project: Study design and profile. *J.*  
912 *Epidemiol.* **27**, S2–S8 (2017).
- 913 19. Bycroft, C. *et al.* The UK Biobank resource with deep phenotyping and genomic data.  
914 *Nature* **562**, 203–209 (2018).
- 915 20. Kurki, M. I. *et al.* FinnGen: Unique genetic insights from combining isolated population and  
916 national health register data. *bioRxiv* (2022) doi:10.1101/2022.03.03.22271360.
- 917 21. Benner, C. *et al.* FINEMAP: Efficient variable selection using summary data from genome-

- 918 wide association studies. *Bioinformatics* **32**, 1493–1501 (2016).
- 919 22. Benner, C., Havulinna, A. S., Salomaa, V., Ripatti, S. & Pirinen, M. Refining fine-mapping:  
920 effect sizes and regional heritability. *bioRxiv* 318618 (2018) doi:10.1101/318618.
- 921 23. Wang, G., Sarkar, A., Carbonetto, P. & Stephens, M. A simple new approach to variable  
922 selection in regression, with application to genetic fine mapping. *J. R. Stat. Soc. Series B*  
923 *Stat. Methodol.* **82**, 1273–1300 (2020).
- 924 24. Onengut-Gumuscu, S. *et al.* Fine mapping of type 1 diabetes susceptibility loci and  
925 evidence for colocalization of causal variants with lymphoid gene enhancers. *Nat. Genet.*  
926 **47**, 381–386 (2015).
- 927 25. Levey, D. F. *et al.* Bi-ancestral depression GWAS in the Million Veteran Program and meta-  
928 analysis in >1.2 million individuals highlight new therapeutic directions. *Nat. Neurosci.* **24**,  
929 954–963 (2021).
- 930 26. Gharakhani, P. *et al.* Genome-wide meta-analysis identifies 127 open-angle glaucoma loci  
931 with consistent effect across ancestries. *Nat. Commun.* **12**, 1258 (2021).
- 932 27. Chen, J. *et al.* The trans-ancestral genomic architecture of glycemic traits. *Nat. Genet.* **53**,  
933 840–860 (2021).
- 934 28. Zhou, W. *et al.* GWAS of thyroid stimulating hormone highlights pleiotropic effects and  
935 inverse association with thyroid cancer. *Nat. Commun.* **11**, 1–13 (2020).
- 936 29. Wightman, D. P. *et al.* A genome-wide association study with 1,126,563 individuals  
937 identifies new risk loci for Alzheimer’s disease. *Nat. Genet.* **53**, 1276–1282 (2021).
- 938 30. Chen, M.-H. *et al.* Trans-ethnic and Ancestry-Specific Blood-Cell Genetics in 746,667  
939 Individuals from 5 Global Populations. *Cell* **182**, 1198–1213.e14 (2020).
- 940 31. Wakefield, J. A Bayesian measure of the probability of false discovery in genetic  
941 epidemiology studies. *Am. J. Hum. Genet.* **81**, 208–227 (2007).
- 942 32. Wakefield, J. Bayes factors for genome-wide association studies: comparison with P-  
943 values. *Genet. Epidemiol.* **33**, 79–86 (2009).
- 944 33. Hormozdiari, F., Kostem, E., Kang, E. Y., Pasaniuc, B. & Eskin, E. Identifying Causal  
945 Variants at Loci with Multiple Signals of Association. *Genetics* **198**, 497–508 (2014).
- 946 34. Kichaev, G. *et al.* Integrating functional data to prioritize causal variants in statistical fine-  
947 mapping studies. *PLoS Genet.* **10**, e1004722 (2014).
- 948 35. Kichaev, G. & Pasaniuc, B. Leveraging Functional-Annotation Data in Trans-ethnic Fine-  
949 Mapping Studies. *Am. J. Hum. Genet.* **97**, 260–271 (2015).
- 950 36. Li, D., Zhao, H. & Gelernter, J. Strong protective effect of the aldehyde dehydrogenase  
951 gene (ALDH2) 504lys (\*2) allele against alcoholism and alcohol-induced medical diseases  
952 in Asians. *Hum. Genet.* **131**, 725–737 (2012).
- 953 37. Brown, B. C., Asian Genetic Epidemiology Network Type 2 Diabetes Consortium, Ye, C. J.,  
954 Price, A. L. & Zaitlen, N. Transethnic Genetic-Correlation Estimates from Summary  
955 Statistics. *Am. J. Hum. Genet.* **99**, 76–88 (2016).
- 956 38. Shi, H. *et al.* Population-specific causal disease effect sizes in functionally important  
957 regions impacted by selection. *bioRxiv* 803452 (2020) doi:10.1101/803452.
- 958 39. COVID-19 Host Genetics Initiative. Mapping the human genetic architecture of COVID-19.  
959 *Nature* **600**, 472–477 (2021).
- 960 40. Dendrou, C. A. *et al.* Resolving *TYK2* locus genotype-to-phenotype differences in  
961 autoimmunity. *Sci. Transl. Med.* **8**, 363ra149 (2016).
- 962 41. Couturier, N. *et al.* Tyrosine kinase 2 variant influences T lymphocyte polarization and  
963 multiple sclerosis susceptibility. *Brain* **134**, 693–703 (2011).
- 964 42. Li, Z. *et al.* Two rare disease-associated Tyk2 variants are catalytically impaired but  
965 signaling competent. *J. Immunol.* **190**, 2335–2344 (2013).
- 966 43. Lam, M. *et al.* RICOPILI: Rapid Imputation for COnsortias PIpeLIne. *Bioinformatics* **36**,  
967 930–933 (2020).
- 968 44. Huang, H. *et al.* Fine-mapping inflammatory bowel disease loci to single-variant resolution.

- 969 *Nature* **547**, 173–178 (2017).
- 970 45. Winkler, T. W. *et al.* Quality control and conduct of genome-wide association meta-  
971 analyses. *Nat. Protoc.* **9**, 1192–1212 (2014).
- 972 46. Chen, W. *et al.* Improved analyses of GWAS summary statistics by reducing data  
973 heterogeneity and errors. *Nat. Commun.* **12**, 7117 (2021).
- 974 47. Yang, J. *et al.* Conditional and joint multiple-SNP analysis of GWAS summary statistics  
975 identifies additional variants influencing complex traits. *Nat. Genet.* **44**, 369–75, S1–3  
976 (2012).
- 977 48. Buniello, A. *et al.* The NHGRI-EBI GWAS Catalog of published genome-wide association  
978 studies, targeted arrays and summary statistics 2019. *Nucleic Acids Res.* **47**, D1005–  
979 D1012 (2019).
- 980 49. 1000 Genomes Project Consortium *et al.* A global reference for human genetic variation.  
981 *Nature* **526**, 68–74 (2015).
- 982 50. McCarthy, S. *et al.* A reference panel of 64,976 haplotypes for genotype imputation. *Nat.*  
983 *Genet.* **48**, 1279–1283 (2016).
- 984 51. Taliun, D. *et al.* Sequencing of 53,831 diverse genomes from the NHLBI TOPMed Program.  
985 *Nature* **590**, 290–299 (2021).
- 986 52. Schoech, A. P. *et al.* Quantification of frequency-dependent genetic architectures in 25 UK  
987 Biobank traits reveals action of negative selection. *Nat. Commun.* **10**, 790 (2019).
- 988 53. Yang, J. *et al.* Genome partitioning of genetic variation for complex traits using common  
989 SNPs. *Nat. Genet.* **43**, 519–525 (2011).
- 990 54. Ormond, C., Ryan, N. M., Corvin, A. & Heron, E. A. Converting single nucleotide variants  
991 between genome builds: from cautionary tale to solution. *Brief. Bioinform.* **22**, (2021).
- 992 55. Asimit, J. L., Hatzikotoulas, K., McCarthy, M., Morris, A. P. & Zeggini, E. Trans-ethnic study  
993 design approaches for fine-mapping. *Eur. J. Hum. Genet.* **24**, 1330–1336 (2016).
- 994 56. Marchini, J. & Howie, B. Genotype imputation for genome-wide association studies. *Nat.*  
995 *Rev. Genet.* **11**, 499–511 (2010).
- 996 57. Karczewski, K. J. *et al.* The mutational constraint spectrum quantified from variation in  
997 141,456 humans. *Nature* **581**, 434–443 (2020).
- 998 58. Sakaue, S. *et al.* A cross-population atlas of genetic associations for 220 human  
999 phenotypes. *Nat. Genet.* **53**, 1415–1424 (2021).
- 1000 59. The GTEx Consortium. The GTEx Consortium atlas of genetic regulatory effects across  
1001 human tissues. *Science* **369**, 1318–1330 (2020).
- 1002 60. Kerimov, N. *et al.* A compendium of uniformly processed human gene expression and  
1003 splicing quantitative trait loci. *Nat. Genet.* **53**, 1290–1299 (2021).
- 1004 61. Koskela, J. T. *et al.* Genetic variant in SPDL1 reveals novel mechanism linking pulmonary  
1005 fibrosis risk and cancer protection. *bioRxiv* (2021) doi:10.1101/2021.05.07.21255988.
- 1006 62. Partanen, J. J. *et al.* Leveraging global multi-ancestry meta-analysis in the study of  
1007 Idiopathic Pulmonary Fibrosis genetics. *bioRxiv* (2021) doi:10.1101/2021.12.29.21268310.
- 1008 63. Foreman, M. G. *et al.* Alpha-1 Antitrypsin PiMZ Genotype Is Associated with Chronic  
1009 Obstructive Pulmonary Disease in Two Racial Groups. *Ann. Am. Thorac. Soc.* **14**, 1280–  
1010 1287 (2017).
- 1011 64. Tsuo, K. *et al.* Multi-ancestry meta-analysis of asthma identifies novel associations and  
1012 highlights the value of increased power and diversity. *bioRxiv* (2021)  
1013 doi:10.1101/2021.11.30.21267108.
- 1014 65. Benonisdotir, S. *et al.* Epigenetic and genetic components of height regulation. *Nat.*  
1015 *Commun.* **7**, 13490 (2016).
- 1016 66. Marouli, E. *et al.* Rare and low-frequency coding variants alter human adult height. *Nature*  
1017 **542**, 186–190 (2017).
- 1018 67. Langefeld, C. D. *et al.* Transancestral mapping and genetic load in systemic lupus  
1019 erythematosus. *Nat. Commun.* **8**, 16021 (2017).



- 1020 68. Hargreaves, C. E. *et al.* Fcγ receptors: genetic variation, function, and disease. *Immunol.*  
1021 *Rev.* **268**, 6–24 (2015).
- 1022 69. Franke, L. *et al.* Association analysis of copy numbers of FC-gamma receptor genes for  
1023 rheumatoid arthritis and other immune-mediated phenotypes. *Eur. J. Hum. Genet.* **24**, 263–  
1024 270 (2016).
- 1025 70. UK10K Consortium *et al.* The UK10K project identifies rare variants in health and disease.  
1026 *Nature* **526**, 82–90 (2015).
- 1027 71. Wang, Y. *et al.* Global biobank analyses provide lessons for computing polygenic risk  
1028 scores across diverse cohorts. *medRxiv* 2021.11.18.21266545 (2021).
- 1029 72. Namba, S. *et al.* A practical guideline of genomics-driven drug discovery in the era of global  
1030 biobank meta-analysis. *bioRxiv* (2021) doi:10.1101/2021.12.03.21267280.
- 1031 73. Wu, K.-H. H. *et al.* Polygenic risk score from a multi-ancestry GWAS uncovers susceptibility  
1032 of heart failure. *bioRxiv* (2021) doi:10.1101/2021.12.06.21267389.
- 1033 74. Lo Faro, V. *et al.* Genome-wide association meta-analysis identifies novel ancestry-specific  
1034 primary open-angle glaucoma loci and shared biology with vascular mechanisms and cell  
1035 proliferation. *bioRxiv* (2021) doi:10.1101/2021.12.16.21267891.
- 1036 75. Surakka, I. *et al.* Multi-ancestry meta-analysis identifies 2 novel loci associated with  
1037 ischemic stroke and reveals heterogeneity of effects between sexes and ancestries.  
1038 *bioRxiv* (2022) doi:10.1101/2022.02.28.22271647.
- 1039 76. Wolford, B. N. *et al.* Multi-ancestry GWAS for venous thromboembolism identifies novel loci  
1040 followed by experimental validation in zebrafish. *medRxiv* (2022)  
1041 doi:10.1101/2022.06.21.22276721.
- 1042 77. Aneas, I. *et al.* Asthma-associated genetic variants induce IL33 differential expression  
1043 through an enhancer-blocking regulatory region. *Nat. Commun.* **12**, 6115 (2021).
- 1044 78. Vladich, F. D. *et al.* IL-13 R130Q, a common variant associated with allergy and asthma,  
1045 enhances effector mechanisms essential for human allergic inflammation. *J. Clin. Invest.*  
1046 **115**, 747–754 (2005).
- 1047 79. All of Us Research Program Investigators *et al.* The ‘All of Us’ Research Program. *N. Engl.*  
1048 *J. Med.* **381**, 668–676 (2019).
- 1049 80. Farh, K. K.-H. *et al.* Genetic and epigenetic fine mapping of causal autoimmune disease  
1050 variants. *Nature* **518**, 337–343 (2015).
- 1051 81. Wojcik, G. L. *et al.* Genetic analyses of diverse populations improves discovery for complex  
1052 traits. *Nature* **570**, 514–518 (2019).
- 1053 82. Luo, Y. *et al.* A high-resolution HLA reference panel capturing global population diversity  
1054 enables multi-ancestry fine-mapping in HIV host response. *Nat. Genet.* **53**, 1504–1516  
1055 (2021).
- 1056 83. Sakaue, S. *et al.* Decoding the diversity of killer immunoglobulin-like receptors by deep  
1057 sequencing and a high-resolution imputation method. *Cell Genomics* **2**, (2022).
- 1058 84. Mukamel, R. E. *et al.* Protein-coding repeat polymorphisms strongly shape diverse human  
1059 phenotypes. *Science* **373**, 1499–1505 (2021).
- 1060 85. Mägi, R. *et al.* Trans-ethnic meta-regression of genome-wide association studies  
1061 accounting for ancestry increases power for discovery and improves fine-mapping  
1062 resolution. *Hum. Mol. Genet.* **26**, 3639–3650 (2017).
- 1063 86. Gagliano Taliun, S. A. *et al.* Exploring and visualizing large-scale genetic associations by  
1064 using PheWeb. *Nat. Genet.* **52**, 550–552 (2020).
- 1065 87. Su, Z., Marchini, J. & Donnelly, P. HAPGEN2: Simulation of multiple disease SNPs.  
1066 *Bioinformatics* **27**, 2304–2305 (2011).
- 1067 88. Manichaikul, A. *et al.* Robust relationship inference in genome-wide association studies.  
1068 *Bioinformatics* **26**, 2867–2873 (2010).
- 1069 89. Chang, C. C. *et al.* Second-generation PLINK: rising to the challenge of larger and richer  
1070 datasets. *Gigascience* **4**, 7 (2015).



- 1071 90. Wei, X. & Nielsen, R. CCR5- $\Delta$ 32 is deleterious in the homozygous state in humans. *Nat.*  
1072 *Med.* **25**, 909–910 (2019).  
1073 91. Maier, R. *et al.* No statistical evidence for an effect of CCR5- $\Delta$ 32 on lifespan in the UK  
1074 Biobank cohort. *Nat. Med.* **26**, 178–180 (2020).  
1075 92. Das, S. *et al.* Next-generation genotype imputation service and methods. *Nat. Genet.* **48**,  
1076 1284–1287 (2016).  
1077 93. Loh, P.-R. *et al.* Reference-based phasing using the Haplotype Reference Consortium  
1078 panel. *Nat. Genet.* **48**, 1443–1448 (2016).  
1079 94. Loh, P.-R. *et al.* Contrasting genetic architectures of schizophrenia and other complex  
1080 diseases using fast variance-components analysis. *Nat. Genet.* **47**, 1385–1392 (2015).  
1081 95. McLaren, W. *et al.* The Ensembl Variant Effect Predictor. *Genome Biol.* **17**, 122 (2016).

1082

## 1083 Global Biobank Meta-analysis Initiative

1084 Wei Zhou<sup>1,2,3</sup>, Masahiro Kanai<sup>1,2,3,4,5</sup>, Kuan-Han H Wu<sup>6</sup>, Humaira Rasheed<sup>7,8,9</sup>, Kristin Tsuo<sup>1,2,3</sup>,  
1085 Jibril B Hirbo<sup>10,11</sup>, Ying Wang<sup>1,2,3</sup>, Arjun Bhattacharya<sup>12</sup>, Huiling Zhao<sup>9</sup>, Shinichi Namba<sup>5</sup>, Ida  
1086 Surakka<sup>13</sup>, Brooke N Wolford<sup>6,7</sup>, Valeria Lo Faro<sup>14,15,16</sup>, Esteban A Lopera-Maya<sup>17</sup>, Kristi Läll<sup>18</sup>,  
1087 Marie-Julie Favé<sup>19</sup>, Juulia J Partanen<sup>20</sup>, Sinéad B Chapman<sup>2,3</sup>, Juha Karjalainen<sup>1,2,3,20</sup>, Mitja  
1088 Kurki<sup>1,2,3,20</sup>, Mutaamba Maasha<sup>1,2,3,20</sup>, Ben M Brumpton<sup>7,21,22</sup>, Sameer Chavan<sup>23</sup>, Tzu-Ting Chen<sup>24</sup>,  
1089 Michelle Daya<sup>23</sup>, Yi Ding<sup>25,12</sup>, Yen-Chen A Feng<sup>26</sup>, Lindsay A Guare<sup>27</sup>, Christopher R Gignoux<sup>23</sup>,  
1090 Sarah E Graham<sup>13</sup>, Whitney E Hornsby<sup>13</sup>, Nathan Ingold<sup>28,29</sup>, Said I. Ismail<sup>30</sup>, Ruth Johnson<sup>31,12</sup>,  
1091 Triin Laisk<sup>18</sup>, Kuang Lin<sup>32</sup>, Jun Lv<sup>33</sup>, Iona Y Millwood<sup>32,34</sup>, Sonia Moreno-Grau<sup>35</sup>, Kisung Nam<sup>36</sup>,  
1092 Priit Palta<sup>18,20</sup>, Anita Pandit<sup>37</sup>, Michael H Preuss<sup>38</sup>, Chadi Saad<sup>30</sup>, Shefali S Setia<sup>39</sup>, Unnur  
1093 Thorsteinsdottir<sup>40</sup>, Jasmina Uzunovic<sup>19</sup>, Anurag Verma<sup>41,42</sup>, Matthew Zawistowski<sup>37</sup>, Xue  
1094 Zhong<sup>10,11</sup>, Nahla Afifi<sup>43</sup>, Kawthar M. Al-Dabhani<sup>43</sup>, Asma Al Thani<sup>43</sup>, Yuki Bradford<sup>27</sup>, Archie  
1095 Campbell<sup>44</sup>, Kristy Crooks<sup>23</sup>, Geertruida H de Bock<sup>45</sup>, Scott M Damrauer<sup>46,27,42</sup>, Nicholas J  
1096 Douville<sup>47,48</sup>, Sarah Finer<sup>49</sup>, Lars G Fritsche<sup>37</sup>, Eleni Fthenou<sup>43</sup>, Gilberto Gonzalez-Arroyo<sup>35,50</sup>,  
1097 Christopher J Griffiths<sup>49</sup>, Yu Guo<sup>51</sup>, Karen A Hunt<sup>52</sup>, Alexander Ioannidis<sup>35,53</sup>, Nomdo M  
1098 Jansonius<sup>14</sup>, Takahiro Konuma<sup>5,54</sup>, Ming Ta Michael Lee<sup>35</sup>, Arturo Lopez-Pineda<sup>35,50</sup>, Yuta  
1099 Matsuda<sup>55</sup>, Riccardo E Marioni<sup>44</sup>, Babak Moatamed<sup>35</sup>, Marco A Nava-Aguilar<sup>35,50</sup>, Kensuke  
1100 Numakura<sup>55</sup>, Snehal Patil<sup>37</sup>, Nicholas Rafaels<sup>23</sup>, Anne Richmond<sup>56</sup>, Agustin Rojas-Muñoz<sup>35</sup>,  
1101 Jonathan A Shortt<sup>23</sup>, Peter Straub<sup>10,11</sup>, Ran Tao<sup>57,11</sup>, Brett Vanderwerff<sup>37</sup>, Manvi Vernekar<sup>55</sup>,  
1102 Yogasudha Veturi<sup>27</sup>, Kathleen C Barnes<sup>23</sup>, Marike Boezen<sup>45,†</sup>, Zhengming Chen<sup>32,34</sup>, Chia-Yen  
1103 Chen<sup>58</sup>, Judy Cho<sup>38</sup>, George Davey Smith<sup>9,59</sup>, Hilary K Finucane<sup>1,3,2</sup>, Lude Franke<sup>17</sup>, Eric R  
1104 Gamazon<sup>10,11,60</sup>, Andrea Ganna<sup>1,2,20</sup>, Tom R Gaunt<sup>9,59</sup>, Tian Ge<sup>61,62</sup>, Hailiang Huang<sup>1,2</sup>, Jennifer  
1105 Huffman<sup>63</sup>, Nicholas Katsanis<sup>35</sup>, Jukka T Koskela<sup>20</sup>, Clara Lajonchere<sup>64,65</sup>, Matthew H Law<sup>28,29</sup>,  
1106 Liming Li<sup>33</sup>, Cecilia M Lindgren<sup>66</sup>, Ruth JF Loos<sup>38,67</sup>, Stuart MacGregor<sup>28</sup>, Koichi Matsuda<sup>68</sup>,  
1107 Catherine M Olsen<sup>28</sup>, David J Porteous<sup>44</sup>, Jordan A Shavit<sup>69</sup>, Harold Snieder<sup>45</sup>, Tomohiro  
1108 Takano<sup>55</sup>, Richard C Trembath<sup>70</sup>, Judith M Vonk<sup>45</sup>, David C. Whiteman<sup>28</sup>, Stephen J Wicks<sup>23</sup>,  
1109 Cisca Wijmenga<sup>17</sup>, John Wright<sup>71</sup>, Jie Zheng<sup>9</sup>, Xiang Zhou<sup>37</sup>, Philip Awadalla<sup>19,72</sup>, Michael  
1110 Boehnke<sup>37</sup>, Carlos D Bustamante<sup>35,53,73</sup>, Nancy J Cox<sup>10,11</sup>, Segun Fatumo<sup>74,75,76</sup>, Daniel H  
1111 Geschwind<sup>77,64,78</sup>, Caroline Hayward<sup>56</sup>, Kristian Hveem<sup>7,21</sup>, Eimear E Kenny<sup>79</sup>, Seunggeun Lee<sup>36</sup>,  
1112 Yen-Feng Lin<sup>24,80,81</sup>, Hamdi Mbarek<sup>30</sup>, Reedik Mägi<sup>18</sup>, Hilary C Martin<sup>82</sup>, Sarah E Medland<sup>28</sup>,  
1113 Yukinori Okada<sup>5,83,84,85,86</sup>, Aarno V Palotie<sup>1,2,20</sup>, Bogdan Pasaniuc<sup>12,77,87,25,64</sup>, Daniel J Rader<sup>27,41</sup>,  
1114 Marylyn D Ritchie<sup>27</sup>, Serena Sanna<sup>88,17</sup>, Jordan W Smoller<sup>61</sup>, Kari Stefansson<sup>40</sup>, David A van  
1115 Heel<sup>52</sup>, Robin G Walters<sup>32,34</sup>, Sebastian Zöllner<sup>37</sup>, Biobank of the Americas, Biobank Japan  
1116 Project, BioMe, BioVU, CanPath - Ontario Health Study, China Kadoorie Biobank Collaborative  
1117 Group, Colorado Center for Personalized Medicine, deCODE Genetics, Estonian Biobank,  
1118 FinnGen, Generation Scotland, Genes & Health Research Team, LifeLines, Mass General  
1119 Brigham Biobank, Michigan Genomics Initiative, National Biobank of Korea, Penn Medicine  
1120 BioBank, Qatar Biobank, The QSkin Sun and Health Study, Taiwan Biobank, The HUNT Study,  
1121 UCLA ATLAS Community Health Initiative, Uganda Genome Resource, UK Biobank, Alicia R  
1122 Martin<sup>1,2,3</sup>, Cristen J Willer<sup>13,6,89\*</sup>, Mark J Daly<sup>1,2,3,20\*</sup>, Benjamin M Neale<sup>1,2,3\*</sup>

1123

1124 †Deceased

1125 \*These authors jointly supervised the initiative

1126

1127 <sup>1</sup>Analytic and Translational Genetics Unit, Department of Medicine, Massachusetts General  
1128 Hospital, Boston, MA, USA, <sup>2</sup>Stanley Center for Psychiatric Research, Broad Institute of MIT and  
1129 Harvard, Cambridge, MA, USA, <sup>3</sup>Program in Medical and Population Genetics, Broad Institute of

1130 MIT and Harvard, Cambridge, MA, USA, <sup>4</sup>Department of Biomedical Informatics, Harvard Medical  
1131 School, Boston, MA, USA, <sup>5</sup>Department of Statistical Genetics, Osaka University Graduate  
1132 School of Medicine, Suita 565-0871, Japan, <sup>6</sup>Department of Computational Medicine and  
1133 Bioinformatics, University of Michigan, Ann Arbor, MI, USA, <sup>7</sup>K.G. Jebsen Center for Genetic  
1134 Epidemiology, Department of Public Health and Nursing, NTNU, Norwegian University of Science  
1135 and Technology, Trondheim, Norway, <sup>8</sup>Division of Medicine and Laboratory Sciences, University  
1136 of Oslo, Norway, <sup>9</sup>MRC Integrative Epidemiology Unit (IEU), Bristol Medical School, University of  
1137 Bristol, Bristol, UK, <sup>10</sup>Department of Medicine, Division of Genetic Medicine, Vanderbilt University  
1138 Medical Center, Nashville, TN, USA, <sup>11</sup>Vanderbilt Genetics Institute, Vanderbilt University Medical  
1139 Center, Nashville, TN, USA, <sup>12</sup>Department of Pathology and Laboratory Medicine, David Geffen  
1140 School of Medicine, University of California, Los Angeles, Los Angeles, CA, USA, <sup>13</sup>Department  
1141 of Internal Medicine, Division of Cardiology, University of Michigan, Ann Arbor, MI, USA,  
1142 <sup>14</sup>University of Groningen, UMCG, Department of Ophthalmology, Groningen, the Netherlands,  
1143 <sup>15</sup>Department of Clinical Genetics, Amsterdam University Medical Center (AMC), Amsterdam, the  
1144 Netherlands, <sup>16</sup>Department of Immunology, Genetics and Pathology, Science for Life Laboratory,  
1145 Uppsala University, Uppsala, Sweden, <sup>17</sup>University of Groningen, UMCG, Department of  
1146 Genetics, Groningen, the Netherlands, <sup>18</sup>Estonian Genome Centre, Institute of Genomics,  
1147 University of Tartu, Tartu, Estonia, <sup>19</sup>Ontario Institute for Cancer Research, Toronto, ON, Canada,  
1148 <sup>20</sup>Institute for Molecular Medicine Finland, University of Helsinki, Helsinki, Finland, <sup>21</sup>HUNT  
1149 Research Centre, Department of Public Health and Nursing, NTNU, Norwegian University of  
1150 Science and Technology, Levanger, Norway, <sup>22</sup>Clinic of Medicine, St. Olavs Hospital, Trondheim  
1151 University Hospital, Trondheim, Norway, <sup>23</sup>University of Colorado - Anschutz Medical Campus,  
1152 Aurora, CO, USA, <sup>24</sup>Center for Neuropsychiatric Research, National Health Research Institutes,  
1153 Miaoli, Taiwan, <sup>25</sup>Bioinformatics Interdepartmental Program, University of California, Los Angeles,  
1154 Los Angeles, CA, USA, <sup>26</sup>Division of Biostatistics, Institute of Epidemiology and Preventive  
1155 Medicine, College of Public Health, National Taiwan University, Taiwan, <sup>27</sup>Department of  
1156 Genetics, Perelman School of Medicine, University of Pennsylvania, Philadelphia, PA, USA,  
1157 <sup>28</sup>QIMR Berghofer Medical Research Institute, Brisbane, Australia, <sup>29</sup>Faculty of Health, School of  
1158 Biomedical Sciences, Queensland University of Technology, Australia, <sup>30</sup>Qatar Genome Program,  
1159 Qatar Foundation Research, Development and Innovation, Qatar Foundation, Doha, Qatar,  
1160 <sup>31</sup>Department of Computer Science, University of California, Los Angeles, Los Angeles, CA, USA,  
1161 <sup>32</sup>Nuffield Department of Population Health, University of Oxford, Oxford, UK, <sup>33</sup>Department of  
1162 Epidemiology and Biostatistics, School of Public Health, Peking University Health Science Center,  
1163 Beijing, China, <sup>34</sup>MRC Population Health Research Unit, University of Oxford, Oxford, UK,  
1164 <sup>35</sup>Galatea Bio Inc., Hialeah, FL, USA, <sup>36</sup>Graduate School of Data Science, Seoul National  
1165 University, <sup>37</sup>Department of Biostatistics and Center for Statistical Genetics, University of  
1166 Michigan, Ann Arbor, MI, USA, <sup>38</sup>The Charles Bronfman Institute for Personalized Medicine, Icahn  
1167 School of Medicine at Mount Sinai, New York, NY, USA, <sup>39</sup>Department of Pathology and  
1168 Laboratory Medicine, Perelman School of Medicine, University of Pennsylvania, Philadelphia, PA,  
1169 USA, <sup>40</sup>deCODE Genetics/Amgen inc., 101, Reykjavik, Iceland, <sup>41</sup>Department of Medicine,  
1170 Perelman School of Medicine, University of Pennsylvania, Philadelphia, PA, USA, <sup>42</sup>Corporal  
1171 Michael Crescenzo VA Medical Center, Philadelphia, PA, USA, <sup>43</sup>Qatar Biobank for Medical  
1172 Research, Qatar Foundation for Education, Science, and Community, Doha, Qatar, <sup>44</sup>Centre for  
1173 Genomic and Experimental Medicine, Institute of Genetics and Cancer, University of Edinburgh,  
1174 Edinburgh, UK, <sup>45</sup>Department of Epidemiology, University Medical Center Groningen, Groningen,  
1175 the Netherlands, <sup>46</sup>Department of Surgery, Perelman School of Medicine, University of  
1176 Pennsylvania, Philadelphia, PA, USA, <sup>47</sup>Department of Anesthesiology, Michigan Medicine, Ann  
1177 Arbor, MI, USA, <sup>48</sup>Institute of Healthcare Policy & Innovation, University of Michigan, Ann Arbor,  
1178 MI, USA, <sup>49</sup>Wolfson Institute of Population Health, Queen Mary University of London, London,  
1179 UK, <sup>50</sup>Amphora Health, Morelia, Michoacan, Mexico, <sup>51</sup>Chinese Academy of Medical Sciences,  
1180 Beijing, China, <sup>52</sup>Blizard Institute, Queen Mary University of London, London, UK, <sup>53</sup>Stanford

1181 University School of Medicine, Stanford, CA, USA, <sup>54</sup>Central Pharmaceutical Research Institute,  
1182 JAPAN TOBACCO INC., Takatsuki 569-1125, Japan, <sup>55</sup>Genomelink, Inc., Berkeley, CA, USA,  
1183 <sup>56</sup>Medical Research Council Human Genetics Unit, Institute of Genetics and Cancer, University  
1184 of Edinburgh, Edinburgh, UK, <sup>57</sup>Department of Biostatistics, Vanderbilt University Medical Center,  
1185 Nashville, TN, USA, <sup>58</sup>Biogen, Cambridge, MA, USA, <sup>59</sup>NIHR Bristol Biomedical Research Centre,  
1186 Bristol, UK, <sup>60</sup>MRC Epidemiology Unit, University of Cambridge, Cambridge, UK, <sup>61</sup>Psychiatric  
1187 and Neurodevelopmental Genetics Unit, Center for Genomic Medicine, Massachusetts General  
1188 Hospital, Boston, MA, USA, <sup>62</sup>Center for Precision Psychiatry, Massachusetts General Hospital,  
1189 Boston, MA, USA, <sup>63</sup>Centre for Population Genomics, VA Boston Healthcare System, Boston,  
1190 MA, USA, <sup>64</sup>Institute of Precision Health, University of California, Los Angeles, Los Angeles, CA,  
1191 USA, <sup>65</sup>Program in Neurogenetics, Department of Neurology, David Geffen School of Medicine,  
1192 University of California, Los Angeles, Los Angeles, CA, USA, <sup>66</sup>Big Data Institute, Li Ka Shing  
1193 Centre for Health Information and Discovery, University of Oxford, Oxford, UK, <sup>67</sup>Novo Nordisk  
1194 Foundation Center for Basic Metabolic Research, Faculty of Medicine and Health Sciences,  
1195 University of Copenhagen, Copenhagen, Denmark, <sup>68</sup>Department of Computational Biology and  
1196 Medical Sciences, Graduate school of Frontier Sciences, The University of Tokyo, Tokyo, Japan,  
1197 <sup>69</sup>University of Michigan, Department of Pediatrics, Ann Arbor MI 48109, <sup>70</sup>School of Basic and  
1198 Medical Biosciences, Faculty of Life Sciences and Medicine, King's College London, London, UK,  
1199 <sup>71</sup>Bradford Institute for Health Research, Bradford Teaching Hospitals National Health Service  
1200 (NHS) Foundation Trust, Bradford, UK, <sup>72</sup>Department of Molecular Genetics, University of  
1201 Toronto, Toronto, ON, Canada, <sup>73</sup>Chan Zuckerberg Biohub, San Francisco, CA, USA, <sup>74</sup>The  
1202 African Computational Genomics (TACG) Research Group, MRC/UVRI and LSHTM, Entebbe,  
1203 Uganda, <sup>75</sup>London School of Hygiene & Tropical Medicine London, UK, <sup>76</sup>Medical Research  
1204 Council/ Uganda Virus Research Institute/London School of Hygiene and Tropical Medicine  
1205 (MRC/UVRI/LSHTM) Uganda research unit, Entebbe, Uganda, <sup>77</sup>Department of Human Genetics,  
1206 David Geffen School of Medicine, University of California, Los Angeles, Los Angeles, CA, USA,  
1207 <sup>78</sup>Department of Neurology, David Geffen School of Medicine, University of California, Los  
1208 Angeles, Los Angeles, CA, USA, <sup>79</sup>Institute for Genomic Health, Icahn School of Medicine at  
1209 Mount Sinai, New York, NY, USA, <sup>80</sup>Department of Public Health & Medical Humanities, School  
1210 of Medicine, National Yang Ming Chiao Tung University, Taipei, Taiwan, <sup>81</sup>Institute of Behavioral  
1211 Medicine, College of Medicine, National Cheng Kung University, Tainan, Taiwan, <sup>82</sup>Medical and  
1212 Population Genomics, Wellcome Sanger Institute, Hinxton, UK, <sup>83</sup>Department of Genome  
1213 Informatics, Graduate School of Medicine, the University of Tokyo, Tokyo 113-0033, Japan.,  
1214 <sup>84</sup>Laboratory of Statistical Immunology, Immunology Frontier Research Center (WPI-IFReC),  
1215 Osaka University, Suita 565-0871, Japan, <sup>85</sup>Laboratory for Systems Genetics, RIKEN Center for  
1216 Integrative Medical Sciences, Yokohama, Japan, <sup>86</sup>Integrated Frontier Research for Medical  
1217 Science Division, Institute for Open and Transdisciplinary Research Initiatives, Osaka University,  
1218 Suita 565-0871, Japan, <sup>87</sup>Department of Computational Medicine, David Geffen School of  
1219 Medicine, University of California, Los Angeles, Los Angeles, CA, USA, <sup>88</sup>Institute for Genetics  
1220 and Biomedical Research (IRGB), National Research Council (CNR), Cagliari, Italy, <sup>89</sup>Department  
1221 of Human Genetics, University of Michigan, Ann Arbor, MI, USA

1222

1223

1224
